Mapping molecular determinants of Ca<sub>v</sub>2.2 inhibition by RGK proteins and homologs in *Xenopus* oocytes

Yehezkel Sasson\*<sup>1</sup>, Suraj Subramaniam\*<sup>1</sup>, Tal Buki<sup>1</sup>, Lior Almagor<sup>1</sup>, Orna Chomsky-Hecht<sup>1</sup>, Moshe Katz<sup>2</sup>, Henry Puhl III<sup>4</sup>, Stephen R. Ikeda<sup>4</sup>, Nathan Dascal<sup>2,3</sup>, Joel A. Hirsch<sup>1,3§</sup>

<sup>1</sup>Dept of Biochemistry and Molecular Biology  
School of Neurobiology, Biochemistry, and Biophysics  
George S. Wise Faculty of Life Sciences

<sup>2</sup>Dept of Physiology and Pharmacology  
Sackler Faculty of Medicine

<sup>3</sup>Sagol School of Neuroscience  
Tel Aviv University  
Ramat Aviv 6997810  
Israel

<sup>4</sup>Laboratory of Molecular Physiology, Section on Transmitter Signaling  
National Institute on Alcohol Abuse and Alcoholism  
National Institutes of Health  
Rockville, MD  
USA

<sup>§</sup>Correspondence: [jhirsch@post.tau.ac.il](mailto:jhirsch@post.tau.ac.il)

\*Authors contributed equally

## Abstract

The Cav1 and Cav2 families of voltage-dependent calcium channels play a crucial role in neurotransmitter release, excitation-contraction and many other cellular processes. Comprised of the membrane pore-forming  $\alpha_1$ , intracellular  $\beta$  and extracellular  $\alpha_2\delta$  subunits, these channels have been targets for pharmacological intervention for decades. Physiological functions of Cav channels are attenuated by either constitutively or transiently bound proteins in the cellular environment. The RGK (Rad, Gem, Rem, and Rem2) G-protein family potently inhibits Cav1 and Cav2 function in heterologous expression systems. RGK proteins bind to Cav $\beta$  and inhibit channel localization and activity by forming a ternary complex with Cav $\alpha_1$ . Here, we evaluated the influence of RGK proteins on Cav2.2 channels heterologously expressed in *Xenopus* oocytes. Both Gem and Rad showed no nucleotide dependency on its inhibitory function on Cav2.2. The G-domain and C-terminus could inhibit the Cav2.2 channel independently when co-expressed with channel subunits. Our results demonstrated that structural determinants in Gem, crucial for channel inhibition, lie within the 222-296 amino acid region containing both the partial G-domain and C-terminus as determined from chimeric Cav $\beta$ -Gem constructs. We expanded our mapping efforts and prepared various chimeras of *Drosophila melanogaster* (*Dm*) RGK sequences fused to Cav $\beta$  and showed that 22 residues in RGK2t and RGK3L C-terminal imparted complete Cav2.2 inhibition. Point mutations in the *Dm*RGK C-terminus, conserved in mammalian RGK proteins, abrogated the Cav2.2 inhibition to a significant extent, pointing to a hot region in the extreme C-terminus for inhibition of Cav channels. Since RGK homologs are now recognized as physiological modulators in  $\beta$ -adrenergic regulation of Cav channels, the relevance of this curious G-protein family deserves close examination.

## Introduction

The RGK mammalian gene family was discovered and cloned in the 1990s as transcriptionally regulated genes encoding small G-proteins. The founding four members (Rad, Gem, Rem, Rem2) all have a conserved architecture, encoding a central G-domain that binds guanosine nucleotides, flanked by a seventy residue N-terminus with little predicted structure and a fifty residue C-terminus (Kelly, 2005; Opatowsky et al., 2006; Yang and Colecraft, 2013). The last twenty residues in the C-terminus direct membrane localization but there is no evidence of any post-translational modification (Bilan et al., 1998; Heo et al., 2006; Splingard et al., 2007). In 2014, we reported that the RGK family was not limited to vertebrate animals but had homologs in the invertebrate world, hence members are also extant for the protostome (Puhl et al., 2014). The sequence motif which uniquely distinguishes RGK family genes and homologs is a conserved region of approximately eleven amino acids at the extreme C-terminus of the open reading frame.

RGK proteins are potent inhibitors of high voltage-activated calcium channels in heterologous systems. They are known to inhibit all Cav1 and Cav2 channels (Beguin et al., 2001; Finlin et al., 2003; Beguin et al., 2005a; Beguin et al., 2005b; Finlin et al., 2005; Beguin et al., 2006; Bannister et al., 2008; Fan et al., 2010; Xu et al., 2010) but have no effect on the low voltage-activated (Cav3) channels (Finlin et al., 2003; Chen et al., 2005; Fan et al., 2010). Cav1 and Cav2 channels are multi-subunit complexes comprising the membrane pore-forming  $\alpha 1$  subunit, an intracellular  $\beta$  subunit and an extracellular subunit,  $\alpha 2\delta$ , that is glycolipid anchored to the plasma membrane (Dolphin, 2013, 2016). RGK proteins mediate their inhibitory effect via direct interaction with the Cav $\beta$  channel subunit (Beguin et al., 2001; Finlin et al., 2003; Ward et al., 2004; Beguin et al., 2005a; Chen et al., 2005; Andres et al., 2006; Correll et al., 2008b). Inhibition is not due to competitive association between Cav $\alpha 1$  and RGK to Cav $\beta$ . Rather, ternary complex formation of Cav $\alpha 1$ , Cav $\beta$  and the RGK protein is essential for proper RGK function (Finlin et al., 2005; Yang et al., 2007; Correll et al., 2008b; Yang et al., 2010). Inhibition can be caused by both reduction of Cav channel cell surface density (Beguin et al., 2001; Beguin et al., 2005a; Beguin et al., 2006) and the inhibition of the I<sub>Ca</sub> on the cell surface (Chen et al., 2005; Leyris et al., 2009; Fan et al., 2010; Yang et al., 2010; Fan et al.,

2012; Yang et al., 2012). Recent studies demonstrate that calcium channel inhibition by RGK proteins is physiologically relevant as Rad plays a central role in adrenergic regulation of Cav1 channels in cardiac myocytes (Ahern et al., 2019; Liu et al., 2020; Katz et al., 2021).

The structural determinants of RGK proteins important for Cav channel inhibition are thought to be located both in the G-domain and the C-terminus (Finlin et al., 2003; Chen et al., 2005; Beguin et al., 2006; Yang et al., 2007; Fan et al., 2012). While some studies show full inhibition can be achieved by the C-terminus alone (Leyris et al., 2009; Fan et al., 2012), others have shown that the G-domain, when sent to the membrane by a heterologous membrane localization signal, is able to impart the full inhibitory effect (Beguin et al., 2006). Together with these contradictory findings and inconsistencies, the ability of RGK proteins to work as molecular switches depending on their nucleotide binding state is also debated. While some studies show GTP-dependent inhibition (Ward et al., 2004; Beguin et al., 2005a; Beguin et al., 2005b; Beguin et al., 2006; Yang et al., 2010) others show no importance of nucleotide identity for RGK function (Bannister et al., 2008; Xu et al., 2010).

Here, we addressed two key questions. (i) Whether the nucleotide (GDP or GTP) bound to RGKs influences its function on Cav channel current inhibition? (ii) What are the precise RGK structural determinants involved in channel inhibition? Therefore, we engineered several constructs with RGKs and expressed them in a heterologous system, *Xenopus* oocytes, and employed the two-electrode voltage clamp (TEVC) approach. Our results show that both Gem and Rad show no nucleotide dependency for their inhibition of an effector, the Cav2.2 channel. Employing a novel chimeric platform, we mapped determinants to residues 222-243 in the G-domain and residues 244-296 in the C-terminus of Gem. We also found that the conserved C-terminus of *Drosophila* RGK-like homologs, exhibited Cav2.2 inhibition to a significant extent and point mutations in this region abrogated the inhibition.

## Materials and Methods

### *DNA constructs*

Rabbit genes encoding Cav2.2  $\alpha$ 1 (GenBank: D14157), Cav $\beta$ 2b (ENA: L06110) and Cav $\alpha$ 2 $\delta$ -1 (UniProt: P13806) were employed. All constructs included a T7 promoter sequence for *in vitro* RNA transcription. RNA transcripts included 5' and 3' untranslated sequences of *Xenopus*  $\beta$ -globin as mentioned previously (Dascal N., 1992). Human Gem (U10550), Rad (L24564) and H-Ras (P01112) cDNAs were amplified by PCR and inserted into pGEM-HJ between BamHI and XbaI restriction sites. Point mutations were created using overlapping PCR. The construction of Ras-Gem chimeras was performed by overlapping PCR. Likewise, Cav $\beta$ <sub>core</sub>-GS linker chimeras were prepared by overlapping PCR of Cav $\beta$ 2b functional core (residues 1-424) with a linker, encoding 15 amino acids of Gly-Ser repetitions (GCGSGSGSGSGSGSGPR). Triple mutant Cav $\beta$ 2b (1-424) (Cav $\beta$ <sub>core</sub>TM) was prepared by introduction of mutations (D244A, D320A, and D322A)(Opatowsky et al., 2003; Katz et al., 2021) into this functional core GS-rich linker cloned into the pGEM-HJ vector. Various lengths of Gem were cloned in tandem into the Cav $\beta$ <sub>core</sub>TM-GS linker C-terminus. *Drosophila melanogaster* RGK-like homologs RGK1 (AAF57577), 2t (AAF57577, amino acids 165-740), 3 (ABV53867, denoted as RGK3S in this study) and 3L (alternative splice variant of ABV53867), described previously (Puhl et al., 2014), were subcloned into pGEM-HJ vector. The various Cav $\beta$ <sub>core</sub>-RGK constructs were amplified by PCR and cloned into pGEM-HJ vector using Gibson assembly. Single- and double-point mutations in RGK2t and 3L were performed by standard overlapping PCR. All constructs were confirmed by DNA sequencing.

### *In vitro RNA transcription*

RNAs were prepared as previously described (Dascal N., 1992; Oz et al., 2017). Oocytes were injected with RNA two to four days before electrophysiological recording. In all experiments unless specified, Cav $\beta$ 2b and  $\alpha$ 2 $\delta$ -1 auxiliary subunits RNAs were co-injected with Cav2.2  $\alpha$ 1 in equal amounts by mass, ranging between 30-150 pg of each subunit. For Cav $\beta$ <sub>core</sub>-Gem and Cav $\beta$ <sub>core</sub>-RGK chimeras, the amount injected was also equal to Cav2.2  $\alpha$ 1 by mass. For Gem, Rad, Ras and Ras-Gem

chimeras, the injected RNA amount was 2 ng per oocyte. Co-expression of RGK1, 2t, 3S and 3L in Fig. S4 was in the ratio of 2:1 (RGK: channel subunits) by mass. In Fig. S5A and B, concentrations of RNAs for Cav $\beta$ <sub>core</sub>-RGKs2t single point mutants were 2 ng each compared to 1 ng of Cav2.2. Similarly, concentrations of RNAs for Cav $\beta$ <sub>core</sub>-RGKs3L single point mutants were 8 ng each.

### *Electrophysiology*

*Xenopus laevis* maintenance and oocyte preparation were as described (Shistik et al., 1998). Whole cell currents were recorded using the Gene Clamp 500B amplifier (Axon Instruments, Foster City, CA) using a two-electrode voltage clamp. Bath perfusion solution contained 50 mM NaOH, 2 mM KOH, 5 mM HEPES and 40 mM of Ba(OH)<sub>2</sub> (titrated to pH 7.5 with methanesulfonic acid). Current-voltage (I-V) relations were measured with 15 ms pulses from a holding potential of -80 mV to test potentials of -50 mV to +50 mV in 10 mV steps. For each cell, the net currents were obtained by subtraction of the residual currents recorded with the same protocols after blocking the channels with 300  $\mu$ M Cd<sup>2+</sup>. Data acquisition and analysis were performed using pCLAMP 9.0 software (Axon Instruments).

### *In-vitro* translation pulldown assay:

Synthesis of S<sup>35</sup>-labeled Cav $\beta$  chimeras was done by coupled in vitro transcription-translation (Promega (L1170)). Five nmole of purified 6xHisTag-MBP-AID was incubated with Ni-NTA beads in 30 mM HEPES pH 7.4, 200 mM NaCl, 5 mM MgCl<sub>2</sub>, 10% glycerol, 5 mM 2-mercaptoethanol, 1% triton and 20 mM imidazole for 1 hour at 4°C. After incubation, beads were washed with the same solution for four times. Binding was initiated by adding 10  $\mu$ l of the S<sup>35</sup>-labeled Cav $\beta$  chimera to 250  $\mu$ l beads solution for one hour on ice with constant mixing of the tube every 5 minutes. The Ni-NTA beads were then centrifuged at 1000 xg for one min and washed six times with one ml of the same solution containing 40 mM imidazole. Last wash was with 40  $\mu$ l of the same solution and elution was carried out with 40  $\mu$ l of the same solution containing 300 mM imidazole. Binding of the Cav $\beta$  -Gem chimeras was analyzed after SDS-PAGE by autoradiography.

### *Statistical analysis*

In all experiments, currents were normalized to the respective control (Cav2.2 group), unless stated otherwise. Error bars are represented as mean  $\pm$  standard error of the mean. Comparison between groups was done using one-way ANOVA for normally distributed data or Kruskal-Wallis ANOVA on ranks on skewed data. Holm-Sidak post hoc analysis was performed for normally distributed data and Dunn's post hoc test, otherwise. Statistical analysis was performed using Sigmaplot 13 (Systat Software Inc. San Jose, CA, USA).

## Results

### *Gem and Rad inhibit Cav2.2 in a nucleotide-independent manner*

Co-expression of WT Gem and Rad with Cav2.2 exhibits almost complete inhibition of the Ba<sup>2+</sup> current via Cav2.2, I<sub>Ba</sub> (Fig. 1). This result was shown previously for all RGK family members heterologously expressed in *Xenopus* oocytes and a diverse selection of human cell lines (Finlin et al., 2003; Beguin et al., 2005a; Chen et al., 2005; Finlin et al., 2005; Pang et al., 2010; Yang et al., 2010; Fan et al., 2012; Yang et al., 2012). We probed the importance of the nucleotide binding pocket and the nucleotide binding state by introduction of point mutations to residues in this region. The nucleotide binding affinities of several of these mutations have been determined previously (Sasson et al., 2011). Specifically, the Gem double mutant E83A, Q84P exhibits impaired GTP binding compared to the WT protein. Gem W133 is highly conserved across all RGK proteins, located in switch II of the G-domain. Finally, the Gem S89N mutant abolishes GTP binding and impairs GDP binding by two orders of magnitude. Moreover, the equivalent mutant in Rad, S105N, generates a protein that binds GDP exclusively. As seen in Fig. 1, both Gem/Rad WT and mutants displayed reduced I<sub>Ba</sub> compared to the control, Cav2.2 alone (P<0.001), whereas no significant differences in the I<sub>Ba</sub> were observed between groups expressing Gem/Rad or their mutants, leading us to conclude that severely compromised nucleotide binding has no effect on RGK channel inhibition and demonstrating that nucleotide switching has no bearing on RGK's effect on Cav2 channel action.

### *The Gem C-terminus is a potent Cav2.2 channel inhibitor*

We next sought to clarify the importance of the Gem G-domain and C-terminus for Gem's function. It remains an open question whether the G-domain contains intrinsic structural determinants important for inhibitory function or rather serves as a protein-protein interaction platform for a functional C-terminus. We examined this question in two independent ways. In the first approach, two chimeras of HRas and Gem were prepared: (i) a chimera composed of the HRas G-domain (residues 1-166) upstream of a Gem C-terminus (residues 244-296) and named RasG-Gem<sub>CT</sub> and (ii) a chimera comprising the HRas G-domain (residues 1-143) upstream of Gem residues 222-296, named RasG-Gem<sub>222-296</sub> (Fig. 2A). The latter chimera was created since this region of Gem (residues 222-296),



expressed as a mini-protein, showed full  $I_{Ba}$  inhibition when tested in *Xenopus* oocytes (Leyris et al., 2009). HRas was selected as the chimeric G domain since the RGK proteins, as based on primary sequence analysis, belong to the Ras subfamily of the five subfamilies in the RAS superfamily (Colicelli, 2004), as we sought to best preserve the overall small G-protein architecture. Our working assumption designing these experiments was that HRas by itself does not associate with  $Ca_v\beta$ , in contrast to the known association by RGK proteins. Significant inhibition of  $I_{Ba}$  by both chimeras was obtained in all groups compared to  $Ca_v2.2$  co-expressed with full length Ras ( $Ras_{FL}$ ) ( $Ca_v2.2 + Ras_{FL}$ ; control)  $P < 0.001$  (Fig. 2C-D). Curiously, when  $Ca_v2.2$  and  $Ras_{FL}$  were co-expressed, a twenty percent larger  $I_{Ba}$  was observed compared to  $Ca_v2.2$  alone ( $P < 0.001$ ). Notably, experimental evidence of H-Ras- $Ca_v\beta2$  interactions demonstrated recently (Servili et al., 2018) may play a role in these modestly elevated currents. Co-expression of  $RasG-Gem_{CT}$  and  $RasG-Gem_{222-296}$  with  $Ca_v2.2$  led to significantly smaller  $I_{Ba}$  as compared to control group ( $P < 0.001$ ) (Fig. 2C-D). However, a difference was also obtained between groups co-expressing  $RasG-Gem_{CT}$  versus  $RasG-Gem_{222-296}$  with  $Ca_v2.2$  ( $P = 0.029$ ) indicating that  $Gem_{CT}$  may possess the minimal necessary structural determinants required for  $Ca_v2.2$  channel inhibition. The fact that we observed partial inhibition leads us to conclude that membrane localization, due to the C-terminus (Heo et al., 2006), may provide some degree of affinity for the holo-channel without a direct  $Ca_v\beta$ -Gem interaction. Alternatively, the Ras G-domain may enable direct interaction with  $Ca_v\beta$ , albeit to a lesser degree than RGK proteins (Servili et al., 2018).

#### *Part of the Gem G-domain and C-terminus exhibit a combined inhibitory effect on $Ca_v2.2$*

The Ras-Gem chimeras demonstrate that the Gem C-terminus (residues 244-296) inhibits the  $Ca_v$  channel when co-expressed as an engineered G-protein. Next, we aimed to ascertain the crucial structural elements in the Gem G-domain and C-terminus crucial for  $Ca_v2.2$  channel inhibition with a different protein engineering strategy. To this end, we prepared fusion chimeras of the  $Ca_v\beta$  functional core (residues 1-424) (Opatowsky et al., 2003) and diverse Gem constructs connected by a fifteen-residue Gly-Ser linker (Fig. 3A). These chimeras were designed to localize various Gem domains to the channel via fusion with  $Ca_v\beta$ , testing their function without the requirement for a non-

covalent Cav $\beta$ -Gem interaction. Variable lengths of Gem sequence were fused to the Cav $\beta$  functional core in the C-terminus rather than full length Cav $\beta$  to avoid having a ~200 residue disordered region separating the two respective domains or proteins. Previously, it was shown that the Cav $\beta$  functional core is sufficient for proper function of this subunit (Opatowsky et al., 2003). No significant differences ( $P=0.138$ ) in  $I_{Ba}$  were observed between full length Cav $\beta$ 2b, Cav $\beta$ 2b-core and Cav $\beta$ 2b-core with the GS-linker on its C-terminus (Fig. S1 and (Katz et al., 2021)). Therefore, all Cav $\beta_{core}$ -Gem chimeras were analyzed in comparison with the Cav $\beta$  functional core-GS linker construct. The Cav $\beta_{core}$ -full length Gem (Cav $\beta_{core}$ -Gem<sub>FL</sub>, Fig. 3) chimera showed complete reduction of the  $I_{Ba}$  ( $P<0.001$ ) (Fig. 3C, extreme right histogram bar) indicating that the linker does not interfere with Gem's inhibitory function. All the Cav $\beta_{core}$ -Gem chimeras (Fig. 3C) exhibited a significant decrease in  $I_{Ba}$  ( $P<0.001$ ) including Gem G-domain (residues 71-243) fused to Cav $\beta$ -core (Cav $\beta_{core}$ -Gem<sub>71-243</sub>) ( $P=0.03$ ) (Fig. 3B-D), when compared to the Cav $\beta_{core}$ -GS linker control construct. Gem residues 222-243, which contains helix 5 of the G-domain, fused to Cav $\beta$  (Cav $\beta_{core}$ -Gem<sub>222-243</sub>) and Gem residues 244-296 fused to Cav $\beta$  (Cav $\beta_{core}$ -Gem<sub>244-296</sub>, Fig. 3A) showed significantly lower  $I_{Ba}$  compared to the Cav $\beta_{core}$ -GS linker (Fig. 3B-D) indicating that both structural elements contribute to channel inhibition independently. However, a longer Gem sequence (residues 222-296) when fused to the Cav $\beta$  functional core (Cav $\beta_{core}$ -Gem<sub>222-296</sub>, Fig. 3A), showed comparable inhibition of  $I_{Ba}$  to Cav $\beta_{core}$ -Gem<sub>FL</sub> (Fig. 3B-D), as a paired statistical test between these two constructs showed  $P=0.932$ . From these results we conclude that two primary structural elements impart Gem's inhibitory function: (i) residues 222-243 and (ii) residues 243-296. Hence, when both these regions are included (residues 222-296), an additive inhibitory effect was observed with significantly smaller Ba<sup>2+</sup> currents compared to chimeras bearing the individual elements, namely Cav $\beta_{core}$ -Gem<sub>222-243</sub> ( $P=0.037$ ) and Cav $\beta_{core}$ -Gem<sub>244-296</sub> ( $P=0.031$ ).

To ascertain whether the inhibition of  $I_{Ba}$  is caused by functional Gem in this novel chimeric framework or is simply a protein engineering artifact that gives rise to misfolded or non-functional Cav $\beta$ , we evaluated the shape of the I-V curve measured from these Cav $\beta_{core}$ -Gem chimeras. As reported previously, presence of Cav $\beta$  causes a hyperpolarizing (leftward) shift in the I-V curve when co-expressed with Cav2.1 (De Waard et al., 1994) and Cav1.2 (Singer et al., 1991) as compared to

oocytes lacking  $\text{Ca}_v\beta$  subunit. I-V curves of  $\text{Ca}_v\beta_{\text{core}}\text{-Gem}_{\text{FL}}$  and  $\text{Ca}_v\beta_{\text{core}}\text{-Gem}_{222-296}$  were measured after six days in order to have large currents to assess I-V curves, as in the case of no  $\text{Ca}_v\beta$  co-expression (Fig. 3F, filled circles). In addition, current amplitudes at +20 mV are presented in Fig. 3E. As seen in Fig. 3F, indeed co-expression of  $\text{Ca}_v\beta_{\text{core}}\text{-Gem}_{\text{FL}}$  and  $\text{Ca}_v\beta_{\text{core}}\text{-Gem}_{222-296}$  with  $\text{Ca}_v2.2$  causes a hyperpolarized shift as compared to  $\text{Ca}_v2.2$  without  $\text{Ca}_v\beta$  subunit expression. These results demonstrate that in the  $\text{Ca}_v\beta_{\text{core}}\text{-Gem}$  chimeras, both  $\text{Ca}_v\beta_{\text{core}}$  and Gem functioned.

#### *Localization of the Gem C-terminus to the holo-channel is sufficient for Gem inhibition*

Previous reports demonstrate that the  $\text{Ca}_v\beta\text{-RGK}$  interaction is crucial for RGK function on  $\text{Ca}_v$  channels, however, this interaction, characterized by charge-charge interactions, can be abolished by use of a mutant  $\text{Ca}_v\beta$  bearing three point mutations, D244A, D320A, and D322A (hereafter,  $\text{Ca}_v\beta\text{TM}$ ) (Beguin et al., 2007; Yang et al., 2012). Our aim was to create a chimeric construct of Gem with this  $\text{Ca}_v\beta\text{TM}$  backbone and assess the influence of the G-domain and C-terminal tail on  $\text{Ca}_v2.2$  inhibition when the Gem polypeptide is not bound to  $\text{Ca}_v\beta$  in the usual three dimensional spatial configuration. Co-expressing Gem with  $\text{Ca}_v\beta_{\text{core}}\text{TM}$  that does not interact with Gem, resulted in the inability of Gem to inhibit the  $I_{\text{Ba}}$ , as expected, while under similar conditions with  $\text{Ca}_v\beta_{\text{core}}$ , Gem almost completely abolished  $I_{\text{Ba}}$  (Fig. S2). When variable lengths of Gem were fused to this  $\text{Ca}_v\beta_{\text{core}}\text{TM}$  in the chimeric framework, the identical inhibitory properties of the different WT  $\text{Ca}_v\beta_{\text{core}}\text{-Gem}$  chimeras described above were retained (Fig. 4A-C, D). Significantly smaller  $I_{\text{Ba}}$  was observed in  $\text{Ca}_v\beta_{\text{core}}\text{TM-Gem}_{\text{FL}}$  and  $\text{Ca}_v\beta_{\text{core}}\text{TM-Gem}_{222-296}$ ,  $\text{Ca}_v\beta_{\text{core}}\text{TM-Gem}_{244-296}$  and  $\text{Ca}_v\beta_{\text{core}}\text{TM-Gem}_{222-243}$  ( $P < 0.001$ ) compared to  $\text{Ca}_v\beta_{\text{core}}\text{TM-GS linker}$ . However, no significant difference in  $I_{\text{Ba}}^{2+}$  currents was detected between  $\text{Ca}_v\beta_{\text{core}}\text{TM-Gem}_{71-243}$  and  $\text{Ca}_v\beta_{\text{core}}\text{TM-GS linker}$  groups. Significant differences in the  $\text{Ba}^{2+}$  currents were observed between  $\text{Ca}_v\beta_{\text{core}}\text{TM-Gem}_{71-243}$  and other  $\text{Ca}_v\beta_{\text{core}}\text{TM-Gem}$  chimeras used ( $P < 0.001$ ). In conclusion, chimeric constructs with intact Gem C-termini (fused to  $\text{Ca}_v\beta_{\text{core}}\text{TM}$ ), remained unaffected by the triple mutation in the  $\text{Ca}_v\beta_{\text{core}}$  and exhibited a large decrease in  $I_{\text{Ba}}$  thereby producing effective inhibition on the effector, the  $\text{Ca}_v2.2$  channel. In addition, the Gem G-domain (residues 71-243) which contains the residues required for the  $\text{Ca}_v\beta_{\text{core}}\text{-Gem}$  interaction,

loses its inhibitory properties, observed in figure 3, when expressed as a chimera with the Cav $\beta_{\text{core}}$ TM, despite its localization to the holo-channel via the GS linker.

The Cav $\beta$ -Gem chimeras were further validated for their ability to bind the pore-forming  $\alpha 1$  subunit. To this end, pulldown experiments were conducted using purified HisTag-MBP-AID fusion proteins immobilized on Ni-NTA beads. *In vitro* translated S<sup>35</sup> Cav $\beta_{\text{core}}$ -Gem<sub>FL</sub> and Cav $\beta_{\text{core}}$ -Gem<sub>222-296</sub>, and their respective Cav $\beta_{\text{core}}$ TM-GS linker versions, showed associations with AID as seen in Fig. S3. These associations were absent when HisTag-MBP alone was used as bait. This result demonstrates that the full Gem inhibitory effect was achieved without perturbing the Cav $\beta$ -AID interaction.

#### *RGK-like homologs from Drosophila melanogaster are potent inhibitors of Cav2.2*

Our previous report with the Ikeda group demonstrated that RGK-like proteins from (*Drosophila melanogaster*, *Dm*) significantly inhibit Cav channels in rat SCG neurons. A multiple sequence alignment presented in that study convincingly showed that the C-terminal ~20 residues, especially the C-7 motif, remain highly conserved across arthropods to vertebrates (Puhl et al., 2014). Our aim was to first characterize the effects on Cav2.2 by these RGK-like homologs from *Drosophila melanogaster* in *Xenopus* oocytes. Having validated their RGK-like function, namely Cav channel inhibition, we then sought to leverage the evolutionary divergence of the Protostome-Deuterostome split to reveal the minimal conserved structural elements encoding Cav channel inhibition. As reported previously, the predicted sequences of *Dm* RGK-like proteins are comprised of: (i) RGK1, (ii) RGK2t amino acids 165-740, (iii) RGK3 (denoted as RGK3S in this study) and (iv) RGK3L (splice variant of RGK3 with a ~30 amino acid insertion after Q401) (Puhl et al., 2014). We co-expressed full length *Dm* RGKs 1, 2t, 3S and 3L with Cav2.2 channel subunits in *Xenopus* oocytes. Similar to mammalian Gem and Rad, the *Dm* RGK-like homologs, RGK1, 2t and 3L indeed reduced I<sub>Ba</sub> significantly (P<0.001) compared to Cav2.2 expression alone (Fig. S4). RGK3S also showed significantly reduced (P=0.042) Ba<sup>2+</sup> currents compared to Cav2.2. However, this variant showed significantly larger currents in comparison to the oocyte group expressing RGK1 (P=0.002). This

difference may be attributed to a short ~30 amino acid region missing in RGK3S compared to RGK3L, which could possess some structural determinants crucial for channel inhibition (Fig. S4).

#### *Ca<sub>v</sub>β-DmRGK chimeras enable mapping of RGK determinants of channel inhibition*

Having validated the functionality of the *Dm* RGK-like proteins in our heterologous system, we then used the chimeric approach described above and created three chimeras each for RGK2t and RGK3L, by fusing variable lengths of RGK2t and 3L sequences downstream of Ca<sub>v</sub>β<sub>core</sub>, separated by the GS linker (Fig. 5A). All six chimeras inhibited Ca<sub>v</sub>2.2 channels to varying degrees. Statistically significant differences were observed between the groups listed in Fig. 5C (P=0.002) and in Fig. 5E (P=0.001), respectively. In Fig. 5 C-D, the two RGK2t chimeras (Ca<sub>v</sub>β<sub>core</sub>-RGK2t<sub>508-576</sub> and Ca<sub>v</sub>β<sub>core</sub>-RGK2t<sub>537-576</sub>) showed significantly smaller I<sub>Ba</sub> (P=0.026 and P=0.002, respectively), than Ca<sub>v</sub>2.2 alone (control). The Ca<sub>v</sub>β<sub>core</sub>-RGK2t<sub>FL</sub> chimera showed complete inhibition of the channel to the point where we could not record measurable currents, despite several attempts which included titrating different concentrations of RNA (Fig. 5 C and D; P<0.001). Similarly, in Fig 5E-F, two RGK3L chimeras (Ca<sub>v</sub>β<sub>core</sub>-RGK3L<sub>373-486</sub> and Ca<sub>v</sub>β<sub>core</sub>-RGK3L<sub>447-486</sub>) showed significantly smaller I<sub>Ba</sub> compared to the Ca<sub>v</sub>2.2 alone (control) with P<0.001 and P=0.015, respectively. Chimera Ca<sub>v</sub>β<sub>core</sub>-RGK3L<sub>FL</sub> clearly exhibited lower Ba<sup>2+</sup> currents compared to Ca<sub>v</sub>2.2 alone, but lacked statistical significance (Fig. 5E-F). Overall, these results suggest that the structural determinants crucial for Ca<sub>v</sub>2.2 channel inhibition lie within the *Dm* RGK2t and RGK3L CT-tails (residues 537-576 and 447-486, respectively).

In an effort to resolve the RGK sequences responsible for inhibition, we used chimeras Ca<sub>v</sub>β<sub>core</sub>-RGK2t<sub>537-576</sub> and Ca<sub>v</sub>β<sub>core</sub>-RGK3L<sub>447-486</sub> as our structure-function probes, as they proved to be most effective in channel inhibition (Fig. 5). First, we incorporated single point mutations in the C-tail region (Fig. 6A and 5B). We chose to mutate cysteine 570 and leucine 573 in the RGK2t CT-tail and cysteine 480 and leucine 483 in the RGK3L CT-tail as these residues are either absolutely or very highly evolutionarily conserved (Puhl et al., 2014). As seen in Fig. 6C-D, single point substitutions with alanine in the RGK2t chimera continued to display inhibition of Ca<sub>v</sub>2.2. Substitutions of C570S or L573R gave the same result (Fig. S5A and B; not significant). Likewise, single point substitutions

with alanine in the RGK3L chimera inhibited  $\text{Ca}_v2.2$  currents (Fig.6E-F), with parallel results for substitutions C480S or L483R (Fig. S5C and D; not significant). Next, we created double mutant versions of these chimeras, incorporating substitutions into both amino acids. Notably, while all chimeras showed significantly lower  $I_{\text{Ba}}$  compared to  $\text{Ca}_v2.2$  alone ( $P < 0.001$ ), the double point mutants significantly attenuated RGK inhibition of the  $\text{Ca}_v2.2$  channel (extreme right histogram bars in panels C and E, Fig. 6), by about fifty seventy percent, for RGK2t and 3L chimeras ( $P = 0.006$  and  $P = 0.020$ , respectively). This result demonstrated that these conserved residues, cysteine and leucine are crucial for the RGK inhibitory effect on  $\text{Ca}_v2.2$  channels. Moreover, this loss of function phenotype required mutation of both residues.

## **Discussion**

The physiological role of RGK proteins in the cell has been enigmatic. Results from initial studies showed that RGK expression underwent transcriptional regulation, suggestive that they act as classical G-protein signaling molecules as based on sequence homology (Reynet and Kahn, 1993; Maguire et al., 1994; Finlin and Andres, 1997; Finlin et al., 2000). Strikingly, reports demonstrating genetic deletions of several RGK members were inconclusive in determining precise physiological function and relevance (Chang et al., 2007; Gunton et al., 2012; Magyar et al., 2012; Manning et al., 2013). Subsequent to their initial cloning, Beguin et al discovered the RGK:Ca<sub>v</sub>β interaction, revealing RGK Ca<sub>v</sub> channel inhibition (Beguin et al., 2007); however, its physiological relevance remained undetermined. Recent studies have now shown *bona fide* physiological relevance for Rad as being a key player in the potentiation of Ca<sub>v</sub>1.2 channel currents during β-adrenergic regulation of cardiomyocytes and HEK cells, as mediated by cAMP and protein kinase A (Ahern et al., 2019; Liu et al., 2020). Our recent work extended this finding, where we showed involvement of Rad in both β1-or β2-mediated adrenergic regulation of Ca<sub>v</sub>1.2 in *Xenopus* oocytes (Katz et al., 2021). Like Rad, other RGK proteins may play similar physiological role(s) in β-adrenergic regulation of other tissues. Paradis et al., have shown Rem2-mediated inhibition of CaMKII concomitantly causes negative regulation of dendritic complexity (Ghiretti et al., 2013; Ghiretti et al., 2014). Surprisingly, direct regulation of calcium currents was not reported using RNAi-based methods on Rem2 in cultured neurons (Wang et al., 2011; Moore et al., 2013). Hence, according to the Paradis group, since Rem2 does not directly regulate inward Ca<sup>2+</sup> currents, they propose that Rem 2 and other RGK proteins like Rem2 may instead be involved in orthogonal signaling pathways that remain poorly explored to date. Older studies of the cytoskeleton revealed that both Gem and Rad negatively regulate Rho kinase thereby playing a critical role in neurite remodeling (Ward et al., 2002). Notably, Rad has been reported to localize to the nucleus and affect transcription via nuclear factor κB inhibition (Hsiao et al., 2014).

Mounting evidence from this study and previous reports clearly suggests that the G-domain largely facilitates localization of the functional RGK C-terminus to the holo-channel, which is necessary for

Ca<sub>v</sub> inhibition. Our results align well with previous reports that demonstrated that deletion of the RGK C-terminus abrogates inhibitory function on Ca<sub>v</sub> channels (Finlin et al., 2003; Chen et al., 2005; Yang et al., 2007; Leyris et al., 2009; Xu et al., 2010; Yang et al., 2010; Fan et al., 2012). Thus, the RGK C-terminus alone could serve as an effective Ca<sub>v</sub> channel inhibitor when localized to the holo-channel either via G-domain or by fusion with Ca<sub>v</sub>β in our chimeric engineered constructs, imparting the inhibitory effect. As showed in previous reports, Gem's inhibitory determinants map to its terminal 75 amino acids (Leyris et al., 2009; Fan et al., 2012). Here we report that the Gem C-terminal 75 amino acids possess two molecular determinants, each independently contributing to Ca<sub>v</sub>2.2 inhibition.

While some studies show GTP binding to be important for RGK function (Ward et al., 2004; Beguin et al., 2005a; Beguin et al., 2005b; Beguin et al., 2006; Xu et al., 2010), others show no contribution of GTP/GDP binding state to their function (Chen et al., 2005; Leyris et al., 2009). The electrophysiological work presented here, shows that guanine nucleotide binding to Gem or Rad has no influence on its inhibitory activity for its effector, the Ca<sub>v</sub>2.2 channel. Our results clearly indicate that while the G-domain could be critical in anchoring the RGK C-terminus to the holo-channel, the G-domain *per se* behaves as a pseudoGTPase since the protein-protein interaction is not dependent on conformation-induced nucleotide binding. Accordingly, a recent review (Stiegler and Boggon, 2020) classified RGKs as pseudoGTPases that play crucial role as signaling molecules within the cell. The classification of pseudoGTPases is an ongoing process as several less-well annotated proteins are now being classified under this group compared to other pseudoenzyme classes (Stiegler and Boggon, 2020). Careful biochemical studies by our group (Opatowsky et al., 2006; Sasson et al., 2011) failed to show any hydrolytic activity for either Gem or Rad, buttressing their identification as pseudoGTPases. Hence, we conclude that RGK proteins do not serve as paradigmatic G-protein molecular switches i.e., fluctuating between GTP-bound 'on' and GDP-bound 'off' state vis a vis their action on calcium channels (Correll et al., 2008a; Yang et al., 2010).

To elaborate a structure-function map of Gem sequences responsible for Ca<sub>v</sub>2.2 channel inhibition, we constructed Ras-Gem fusion chimeras. The rationale behind using HRas as the framework for chimeras was that HRas would behave in a structurally neutral manner when co-



expressed with Cav2.2 channel as RGKs are a subfamily of the Ras family (Colicelli, 2004). To our surprise, the results (Fig. 2C) showed that HRas may even enhance  $I_{Ba}$ . This finding is consistent with results reported by other groups previously in several neuronal cell types (Hescheler et al., 1991; Hahnel et al., 1992; Pollock and Rane, 1996; Fitzgerald and Dolphin, 1997; Lei et al., 1998). The enhanced  $I_{Ba}$  may be attributed to the observed Cav $\beta$ :H-Ras interaction (Servili et al., 2018) responsible for depolarization-induced gene activation described recently. Despite the potentiation of  $I_{Ba}$  by HRas, our results clearly demonstrate that in the context of Ras-Gem chimeras, the Gem C-terminus inhibited  $I_{Ba}$  Cav2.2 currents, pointing to the Gem C-tail as possessing a primary molecular determinant(s) responsible for channel inhibition. We conclude that the Cav $\beta$ :G-protein interaction has some level of conservation in the Ras family clade of small G-proteins.

We then engineered Cav $\beta_{core}$ -Gem fusion chimeras in order to map the structural determinants that are necessary and sufficient for Gem-mediated Cav2.2 channel inhibition. This novel chimeric fusion replaced the Cav $\beta$ -Gem non-covalent interaction, obviating the need for a specific motif that is responsible for Cav $\beta$ -RGK interaction (Beguin et al., 2007). Such a fusion also facilitates appropriate localization of the functional RGK unit (Gem) to the holo-channel. We assessed the functionality of two such chimeric Cav $\beta$ s by assessing the shape of the I-V curve using a control group lacking Cav $\beta$  co-expression. The chimeras (Fig. 3F) showed a hyperpolarized shift versus the control group owing to the presence of a functional Cav $\beta_{core}$  characterized previously (Singer et al., 1991; De Waard et al., 1994). Therefore, both Cav $\beta_{core}$  and Gem remained functional in such a chimeric arrangement, with the holo-channel localized to the plasma membrane. In an orthogonal approach, using pull downs with *in-vitro* translated Cav $\beta_{core}$ -Gem<sub>FL</sub> and Cav $\beta_{core}$ -Gem<sub>222-296</sub> and purified MBP-AID as a bait, we demonstrated that complexation of Cav $\beta_{core}$  with the I-II linker and the AID specifically remained uncompromised in these chimeras. The chimeric Cav $\beta$ -Gem constructs show that Gem<sub>222-296</sub> possesses two determinants, each independently contributing to Cav2.2 inhibition. Our results align well with a previous report where structural determinants in Gem responsible for inhibiting the Cav2.1 channel were mapped to the twelve amino acids in the C-terminus and may involve L241/R242/R243 amino acids in the Cav $\beta$  core (Fan et al., 2012).

Subsequently, we characterized chimeric constructs bearing a triple mutation (TM) in  $\text{Ca}_v\beta_{\text{core}}$  and fused variable lengths of Gem to it, as done with wild-type  $\text{Ca}_v\beta_{\text{core}}$ . The rationale for this experimental series was to ascertain whether the native quaternary structure comprised of  $\alpha_{1B}$ , Gem and  $\text{Ca}_v\beta$  is required for the positioning of Gem on the holo-channel in Gem-mediated inhibition. Our results show that the TM mutant chimeras remained functional, inhibiting channel currents. Chimeras with intact Gem C-termini showed maximal decrease in  $\text{Ba}^{2+}$  currents. Hence, chimeras-  $\text{Ca}_v\beta_{\text{core}}$ -Gem<sub>FL</sub>,  $\text{Ca}_v\beta_{\text{core}}$ -Gem<sub>222-296</sub> and  $\text{Ca}_v\beta_{\text{core}}$ -Gem<sub>244-296</sub> possess the principal molecular determinant(s) involved in reducing  $I_{\text{Ba}}$   $\text{Ca}_v2.2$  currents but, importantly, do not need to be oriented by  $\text{Ca}_v\beta$  in a specific spatial arrangement to affect channel activity with the following caveat. The partial inhibitory effect observed with the G-domain (residues 71-243) vanishes when in a chimeric arrangement with  $\text{Ca}_v\beta_{\text{core}}$ -TM as opposed to when fused with  $\text{Ca}_v\beta_{\text{core}}$  (Fig. 4C vs Fig. 3C, respectively). We believe that this specific loss of partial inhibition may be due in part to improper positioning within the holo-channel. On the other hand, the three mutations of  $\text{Ca}_v\beta_{\text{core}}$ -TM disrupt the  $\text{Ca}_v\beta_{\text{core}}$  GuK domain-Gem G-domain interface (Beguin et al., 2007), and presumably are also disrupted in the  $\text{Ca}_v\beta_{\text{core}}$ TM-Gem<sub>71-243</sub> chimera. Taken together, results from the chimeric approach ( $\text{Ca}_v\beta_{\text{core}}$ TM-Gem) emphasize the importance of Gem C-termini in Gem-mediated inhibition. We posit that Gem's membrane localization, in part, is mediated by interaction with  $\text{Ca}_v\beta$ , and in turn  $\text{Ca}_v\beta$ 's position within the holo-channel.

The development of  $\text{Ca}_v\beta$  chimeras described in this study represents a novel platform for investigating  $\text{Ca}_v$  structure-function. Here, we have employed it for studying RGK function. In a complementary manner, Colecraft and coworkers [reviewed in (Colecraft, 2020)] fused PKC $\gamma$ -C1 to various cytosolic proteins, namely  $\text{Ca}_v\beta$ , CaM, and Rem. These engineered molecules behave as calcium channel blockers when activated with phorbol ester in HEK 293 cells. Contrary to their approach, our chimeric constructs have fused RGK elements fused to  $\text{Ca}_v\beta_{\text{core}}$ , which uses the polybasic motif in the RGK C-terminus for membrane localization rather than the C1 domain. While it cannot be excluded that our  $\text{Ca}_v\beta$ -RGK chimera may behave akin to the C1 fusion protein in the context of membrane anchoring and calcium channel inhibition, the RGK effect may be reversible via

phosphorylation (Katz et al., 2021; Liu et al 2020), unlike C1-fused RGK proteins whose phorbol ester-dependent membrane association is practically speaking irreversible.

We previously reported that RGK-like proteins from *Drosophila melanogaster* inhibited  $I_{Ca}$  in rat superior cervical ganglion neurons (Puhl et al., 2014). In the current study, we corroborated this finding, showing that *Dm*RGKs could inhibit mammalian  $Ca_v2.2$  channels in the heterologous oocyte system. Having confirmed their functionality in oocytes, we then used a parallel molecular chimeric approach wherein variable lengths of RGK2t and 3L were fused to functional  $Ca_v\beta_{core}$  to characterize the channel inhibition and to further map the determinants in these *Dm*RGKs. Our goal was to decipher molecular determinants in these evolutionarily distant *Dm*RGK homologs that nonetheless possess the conserved C-termini and exhibit similar functional activities as mammalian RGKs. In this manner, we leverage evolution to identify the minimal necessary but sufficient structure-function determinants required for channel inhibition. Analogous to highly conserved enzyme active-sites (Jack et al., 2016), the functional RGK C-terminus has likely remained conserved during evolution (Puhl et al., 2014) due to strong selection pressure. Our findings reveal that both *Dm*RGK C-tails potentially inhibit the channel independently without the involvement of a G-domain, unlike Gem (residues 222-243) that possesses determinants in both the G-domain and C-tail. In the case of *Dm*RGK single point mutants, the identity of the substitution i.e., cysteine to serine/alanine or leucine to arginine/alanine in both RGK2t and 3L chimeras (Fig. S5) did not markedly attenuate the inhibitory function. This finding implies that substitution of cysteine with a polar or non-polar residue or substitution of leucine with a positively charged or non-polar residue do not by themselves disrupt the C-tail's interaction with its target. C-tail double-point mutants of these highly conserved amino acids (Puhl et al., 2014), indeed markedly weakened the inhibitory effect but did not abrogate it, implying that other RGK residues in both  $Ca_v\beta_{core}$  RGK2t<sub>537-576</sub> C570A L573A and  $Ca_v\beta_{core}$  RGK3L<sub>447-486</sub> C480A L483A constructs impart inhibition to some degree. We posit that the C-terminal region constitutes a “hot region,” constituting a dominant peptidic segment [reviewed in (London et al., 2013; Ozdemir et al., 2018)] mediating plasma membrane or protein interaction. Notably, the invariant ‘cysteine’ within the C-terminal seven amino acid sequence is absolutely conserved across all RGK proteins (Puhl et al., 2014). To date, no lipid modification of this cysteine has been reported.

Further, in a comprehensive structural bioinformatic study of cysteine positions based upon structural databases, cysteines have “the highest tendency to be found in crucially important regions of proteins” and do not serve as generic hydrophobic or hydrophilic residues, unlike other amino acids (Marino and Gladyshev, 2010).

In framing these findings, we propose that the generic RGK protein behaves in a manner similar to channel toxins. Like toxins, RGK proteins inhibit channel activity and are soluble factors. In other words, RGKs may serve as endogenous, cell autonomous intracellular factors that inhibit calcium channels, as opposed to toxins which are exogenous factors that evolved as part of physiological defense systems. Another molecular precedent might be phospholamban, a cellular endogenous membrane protein that acts to inhibit the calcium pump, SERCA, in a reversible manner.

Toxins primarily function via two known mechanisms: *(i)* pore blockers, that bind to the outer vestibule and block the ion flow; *(ii)* gating modifiers, interact with a channel region and alter channel conformation whilst opening or inactivating and influence the gating mechanism (Kalia et al., 2015).  $\omega$ -conotoxin GVIA inhibits Cav2 channels, occluding the Cav $\alpha$ 1.2.2 pore thereby preventing Ca<sup>2+</sup> influx (McCleskey et al., 1987). But, unlike  $\omega$ -conotoxin GVIA, that selectively binds to Cav2.2 in a virtually irreversible manner, the effect of RGKs can be reversed (Liu et al., 2020; Katz et al., 2021) by their phosphorylation, releasing them from the holo-channel. Therefore, in this framework, the RGK in the Cav $\beta$ :RGK chimeric molecule, might occlude the cytoplasmic opening of Cav $\alpha$ 1 pore by inserting itself, analogous to the ‘ball and chain’ model for Shaker channels (Armstrong, 1981) concomitantly decreasing the open probability of the channel. It remains quite possible that RGK proteins exhibit multiple modalities to regulate Cav channels: *(a)* directly, by physical occlusion of the Cav $\alpha$ 1 pore; *(b)* indirectly, by interacting with Cav $\beta$  subunit, restricting its movement in the holo-channel (Yang et al., 2010; Yang and Colecraft, 2013).

### ***Acknowledgments***

This work was supported by Israel Science Foundation grants 1519/12, 1500/16, 2780/20 to JAH. SS was supported in part by a scholarship from the Prajs–Drimmer Institute at Tel Aviv University. We would like to acknowledge Louise M Silverman for her assistance in recordings. German-Israeli Science Foundation (GIF grant I-1452-203.13/2018) to N.D. and the Gessner Fund grant to M.K.

### ***Author contributions***

Yehezkel Sasson, Suraj Subramaniam, Lior Almagor, Tal Buki, Orna Chomsky-Hecht, Moshe Katz performed the experiments; Yehezkel Sasson, Suraj Subramaniam, Lior Almagor, Tal Buki, Joel Hirsch and Nathan Dascal analyzed the data. Henry Puhl III and Steve Ikeda contributed reagents. Yehezkel Sasson, Suraj Subramaniam and Joel Hirsch wrote the paper. All authors read and approve the manuscript.

### ***Conflict of interest***

The authors declare no conflict of interest

## Figure legends

**Fig. 1. Cav2.2 inhibition by WT Gem and Rad different point mutants.** (A). Representative traces of  $I_{Ba}^{2+}$  recorded during depolarization from -80 mV to + 20 mV applied to oocytes expressing Cav2.2 +  $\alpha_2\delta$  +  $\beta_2b$  cRNAs and Gem or Rad cRNAs. (B) Representative traces of peak currents are shown in (A). All currents were normalized to the Cav2.2 peak current which served as control. WT Gem and Rad and the mutants all showed almost complete inhibition of the measured  $I_{Ba}$  (C) I-V curves of the constructs mentioned in (A). (\*) indicates statistical significance versus the control group. Statistics: One-Way ANOVA ( $P < 0.001$ ). The number of cells tested are indicated on the bar. \*:  $P < 0.05$ ; \*\*:  $P < 0.01$ ; \*\*\*:  $P < 0.001$ .

**Fig. 2. Cav2.2 inhibition by Ras-Gem chimeras.** (A) A schematic overview of the different constructs measured. (B) Representative traces of  $I_{Ba}^{2+}$  recorded during depolarization from -80 mV to + 20 mV applied to oocytes expressing Cav2.2 +  $\alpha_2\delta$  +  $\beta_2b$  cRNAs and cRNAs of different Ras-Gem chimeras. (C) Representative traces of peak currents of the constructs mentioned in (A). All currents were normalized to the Cav2.2 peak current. Significant differences in  $I_{Ba}$  were obtained in groups. Red asterisk indicates significant differences between Cav2.2+Ras<sub>FL</sub> (control) and other groups. (D) I-V curves of the constructs mentioned in (A). Black asterisk indicates significant differences between the denoted groups. The number of cells tested are indicated on the bar. Statistics: One-Way ANOVA ( $P < 0.001$ ). \*:  $P < 0.05$ ; \*\*:  $P < 0.01$ ; \*\*\*:  $P < 0.001$ .

**Fig. 3. Cav2.2 inhibition by Cav $\beta_{core}$ -Gem chimeras.** (A) A schematic overview of the different Cav $\beta_{core}$ -Gem chimeras measured. (B) Representative traces of  $I_{Ba}^{2+}$  recorded during depolarization from -80 mV to + 20 mV applied to oocytes expressing Cav2.2 +  $\alpha_2\delta$  cRNAs and cRNAs of different Cav $\beta$ -Gem chimeras. (C) Representative traces of peak currents of constructs mentioned in (A). Currents were normalized to the Cav $\beta_{core}$ -GS linker peak current. Black asterisk indicates significant differences between the peak currents of all Cav $\beta_{core}$ -Gem chimeras compared to Cav $\beta$ -GS linker

group. Red asterisk indicates significant differences  $\text{Ca}_v\beta_{\text{core}}\text{-Gem}_{71-243}$  and other  $\text{Ca}_v\beta\text{-Gem}$  chimeras. Blue asterisk indicates significant differences between the denoted groups. (D) I-V curves of the constructs mentioned in (A). (E) Averaged peak currents after 6 days. (F) I-V curves of the  $\beta\text{-Gem}$  chimeras compared to  $\text{Ca}_v2.2$  without  $\text{Ca}_v\beta$  group after 6 days. Each I-V curve was normalized to its own peak current. Statistics: One-Way ANOVA ( $P < 0.001$ ). The number of cells tested are indicated in the histogram bar.

\*:  $P < 0.05$ ; \*\*:  $P < 0.01$ ; \*\*\*:  $P < 0.001$ .

**Fig. 4.  $\text{Ca}_v2.2$  inhibition by  $\text{Ca}_v\beta_{\text{core}}\text{TM-Gem}$  chimeras.** (A) A schematic overview of the different  $\text{Ca}_v\beta_{\text{core}}\text{TM-Gem}$  chimeras measured. Green lines represent three-point mutations in the  $\text{Ca}_v\beta_{\text{core}}\text{TM}$  (D244A, D320A & D322A) (B) Representative traces of  $I_{\text{Ba}^{2+}}$  recorded during depolarization from -80 mV to +20 mV applied to oocytes expressing  $\text{Ca}_v2.2 + \alpha_2\delta$  cRNAs and cRNAs of different  $\text{Ca}_v\beta_{\text{core}}\text{TM-Gem}$  chimeras. (C) Averaged peak currents of the samples displayed in (A). Currents were normalized to the  $\text{Ca}_v\beta_{\text{core}}\text{TM-GS}$  linker peak current. Significant differences were observed between the peak currents of  $\text{Ca}_v\beta_{\text{core}}\text{TM-GS}$  linker shown by black asterisk and between  $\text{Ca}_v\beta_{\text{core}}\text{TM-Gem}_{71-243}$  shown by red asterisk compared to the other chimeras. The blue asterisk indicates significant difference between the denoted groups. No significant differences in the peak currents were observed between  $\text{Ca}_v\beta_{\text{core}}\text{TM-Gem}_{71-243}$  to  $\text{Ca}_v\beta_{\text{core}}\text{TM-GS}$  linker. (D) I-V curves of the constructs mentioned in (A). The peak current of  $\text{Ca}_v2.2 + \text{Ca}_v\beta_{\text{core}}\text{TM-GS}$  linker was normalized to 1 and other currents were calculated relative to it. Statistics: One-Way ANOVA ( $P < 0.001$ ). The number of cells tested are indicated in the histogram bar.

\*:  $P < 0.05$ ; \*\*:  $P < 0.01$ ; \*\*\*:  $P < 0.001$ .

**Fig. 5. *Drosophila melanogaster* RGK chimeras are potent inhibitors of  $\text{Ca}_v2.2$**  (A) A schematic overview of the different RGK2t and RGK3L chimeras fused to  $\text{Ca}_v\beta_{\text{core}}$  are shown. (B) Representative traces of  $I_{\text{Ba}^{2+}}$  recorded during depolarization from -80 mV to +20 mV applied to oocytes expressing  $\text{Ca}_v2.2 + \alpha_2\delta$  cRNAs and cRNAs of different  $\text{Ca}_v\beta_{\text{core}}\text{-RGK2t}$  and RGK3L chimeras. (C, E) Currents were normalized to the  $\text{Ca}_v2.2$  peak current (control) respectively. In (C),

chimeras  $\text{Ca}_v\beta_{\text{core}}\text{-RGK2}_{\text{t508-576}}$  and  $\text{Ca}_v\beta_{\text{core}}\text{-RGK2}_{\text{t537-576}}$  showed significantly lower  $I_{\text{Ba}}$  compared to the control  $\text{Ca}_v2.2$  group ( $P=0.002$ ). Similarly, in (E) chimeras  $\text{Ca}_v\beta_{\text{core}}\text{-RGK3L}_{\text{373-486}}$  and  $\text{Ca}_v\beta_{\text{core}}\text{-RGK3L}_{\text{447-486}}$  showed significantly lower  $I_{\text{Ba}}$  compared to the control  $\text{Ca}_v2.2$  group ( $P=0.001$ ). (D and F) I-V curves of the constructs mentioned in (A). The peak current of  $\text{Ca}_v2.2$  was normalized to -1 and other currents were calculated relative to it. The number of cells tested are indicated in the bar. Statistics: Kruskal-Wallis One-Way ANOVA on ranks. (\*) indicate significant differences versus the control group respectively. The number of cells tested are indicated in the histogram bar.

\*:  $P < 0.05$ ; \*\*:  $P < 0.01$ ; \*\*\*:  $P < 0.001$ .

**Fig. 6. Double-point mutation in RGKs exhibited loss-of-function effect on  $\text{Ca}_v2.2$ .** (A, B)

Representative traces of  $I_{\text{Ba}}^{2+}$  recorded during depolarization from -80 mV to +20 mV applied to oocytes expressing  $\text{Ca}_v2.2 + \alpha_2\delta$  cRNAs and cRNAs of different  $\text{Ca}_v\beta_{\text{core}}\text{-RGK2t}$  and  $\text{RGK3L}$  chimeras with single- and double-point mutations. The last eleven C-terminal residues for  $\text{RGK2}$  and  $\text{RGK3}$  are shown. Highlighted in cyan and green are the cysteine and leucine residues that were mutated in the chimeras. (C, E) Currents were normalized to the  $\text{Ca}_v2.2$  peak current which served as the control group respectively. In (C), chimeras-  $\text{Ca}_v\beta_{\text{core}}\text{-RGK2}_{\text{t537-576}}$  along with single point mutants  $\text{Ca}_v\beta_{\text{core}}\text{-RGK2}_{\text{t537-576}}$  C570A and L573A and double point mutants  $\text{Ca}_v\beta_{\text{core}}\text{-RGK2}_{\text{t537-576}}$  C570A L573A showed significantly lower  $I_{\text{Ba}}$  compared to the control  $\text{Ca}_v2.2$  group. However, the double mutant showed significantly greater  $I_{\text{Ba}}$  than the  $\text{Ca}_v\beta_{\text{core}}\text{-RGK2}_{\text{t537-576}}$  and  $\text{Ca}_v\beta_{\text{core}}\text{-RGK2}_{\text{t537-576}}$  C570A chimeras. Black asterisk indicates significant differences versus the control group. Red asterisk indicates significant difference between the denoted groups. (D) I-V curves of the constructs mentioned in (A). Similarly, in (E) chimeras-  $\text{Ca}_v\beta_{\text{core}}\text{-RGK3L}_{\text{447-486}}$  along with single point mutants  $\text{Ca}_v\beta_{\text{core}}\text{-RGK3L}_{\text{447-486}}$  C480A and L483A and double point mutants  $\text{Ca}_v\beta_{\text{core}}\text{-RGK3L}_{\text{447-486}}$  C480A L483A showed significantly lower  $I_{\text{Ba}}$  compared to the control group. However, the double mutant showed significantly greater  $I_{\text{Ba}}$  than the  $\text{Ca}_v\beta_{\text{core}}\text{-RGK3L}_{\text{447-486}}$ ,  $\text{Ca}_v\beta_{\text{core}}\text{-RGK3L}_{\text{447-486}}$  C480A and  $\text{Ca}_v\beta_{\text{core}}\text{-RGK3L}_{\text{447-486}}$  L483A. Black asterisk indicates indicate significant differences versus the control group. Red asterisk indicates significant difference observed compared to  $\text{Ca}_v\beta_{\text{core}}\text{-RGK3L}_{\text{447-486}}$  C480A L483A and other groups. (F) I-V curves of the constructs of panel B. The peak current of



$Ca_v2.2$  was normalized to 1 and other currents were calculated relative to it. The number of cells tested are indicated in the bar. Statistics: One-Way ANOVA ( $P < 0.001$ ). The number of cells tested are indicated in the histogram bar.

\*:  $P < 0.05$ ; \*\*:  $P < 0.01$ ; \*\*\*:  $P < 0.001$ .

## References

- Ahern, B.M., B.M. Levitan, S. Veeranki, M. Shah, N. Ali, A. Sebastian, W. Su, M.C. Gong, J. Li, J.E. Stelzer, D.A. Andres, and J. Satin. 2019. Myocardial-restricted ablation of the GTPase RAD results in a pro-adaptive heart response in mice. *J Biol Chem.* 294:10913-10927.
- Andres, D.A., S.M. Crump, R.N. Correll, J. Satin, and B.S. Finlin. 2006. Analyses of Rem/RGK signaling and biological activity. *Methods Enzymol.* 407:484-498.
- Armstrong, C.M. 1981. Sodium channels and gating currents. *Physiol Rev.* 61:644-683.
- Bannister, R.A., H.M. Colecraft, and K.G. Beam. 2008. Rem inhibits skeletal muscle EC coupling by reducing the number of functional L-type Ca<sup>2+</sup> channels. *Biophys J.* 94:2631-2638.
- Beguin, P., R.N. Mahalakshmi, K. Nagashima, D.H. Cher, H. Ikeda, Y. Yamada, Y. Seino, and W. Hunziker. 2006. Nuclear sequestration of beta-subunits by Rad and Rem is controlled by 14-3-3 and calmodulin and reveals a novel mechanism for Ca<sup>2+</sup> channel regulation. *J Mol Biol.* 355:34-46.
- Beguin, P., R.N. Mahalakshmi, K. Nagashima, D.H. Cher, N. Kuwamura, Y. Yamada, Y. Seino, and W. Hunziker. 2005a. Roles of 14-3-3 and calmodulin binding in subcellular localization and function of the small G-protein Rem2. *Biochem J.* 390:67-75.
- Beguin, P., R.N. Mahalakshmi, K. Nagashima, D.H. Cher, A. Takahashi, Y. Yamada, Y. Seino, and W. Hunziker. 2005b. 14-3-3 and calmodulin control subcellular distribution of Kir/Gem and its regulation of cell shape and calcium channel activity. *J Cell Sci.* 118:1923-1934.
- Beguin, P., K. Nagashima, T. Gonoi, T. Shibasaki, K. Takahashi, Y. Kashima, N. Ozaki, K. Geering, T. Iwanaga, and S. Seino. 2001. Regulation of Ca<sup>2+</sup> channel expression at the cell surface by the small G-protein kir/Gem. *Nature.* 411:701-706.
- Beguin, P., Y.J. Ng, C. Krause, R.N. Mahalakshmi, M.Y. Ng, and W. Hunziker. 2007. RGK small GTP-binding proteins interact with the nucleotide kinase domain of Ca<sup>2+</sup>-channel beta-subunits via an uncommon effector binding domain. *J Biol Chem.* 282:11509-11520.
- Bilan, P.J., J.S. Moyers, and C.R. Kahn. 1998. The ras-related protein rad associates with the cytoskeleton in a non-lipid-dependent manner. *Exp Cell Res.* 242:391-400.
- Chang, L., J. Zhang, Y.H. Tseng, C.Q. Xie, J. Ilany, J.C. Bruning, Z. Sun, X. Zhu, T. Cui, K.A. Youker, Q. Yang, S.M. Day, C.R. Kahn, and Y.E. Chen. 2007. Rad GTPase deficiency leads to cardiac hypertrophy. *Circulation.* 116:2976-2983.
- Chen, H., H.L. Puhl, 3rd, S.L. Niu, D.C. Mitchell, and S.R. Ikeda. 2005. Expression of Rem2, an RGK family small GTPase, reduces N-type calcium current without affecting channel surface density. *J Neurosci.* 25:9762-9772.
- Colecraft, H.M. 2020. Designer genetically encoded voltage-dependent calcium channel inhibitors inspired by RGK GTPases. *J Physiol.* 598:1683-1693.
- Colicelli, J. 2004. Human RAS superfamily proteins and related GTPases. *Sci STKE.* 2004:RE13.
- Correll, R.N., G.J. Botzet, J. Satin, D.A. Andres, and B.S. Finlin. 2008a. Analysis of the Rem2 - voltage dependant calcium channel beta subunit interaction and Rem2 interaction with phosphorylated phosphatidylinositide lipids. *Cell Signal.* 20:400-408.

- Correll, R.N., C. Pang, D.M. Niedowicz, B.S. Finlin, and D.A. Andres. 2008b. The RGK family of GTP-binding proteins: regulators of voltage-dependent calcium channels and cytoskeleton remodeling. *Cell Signal*. 20:292-300.
- Dascal N., L.I. 1992. Expression of Exogenous Ion Channels and Neurotransmitter Receptors in RNA-Injected *Xenopus* Oocytes. *In Methods Mol Biol*. Springer, Totowa, NJ. 205-225.
- De Waard, M., M. Pragnell, and K.P. Campbell. 1994. Ca<sup>2+</sup> channel regulation by a conserved beta subunit domain. *Neuron*. 13:495-503.
- Dolphin, A.C. 2013. The alpha2delta subunits of voltage-gated calcium channels. *Biochim Biophys Acta*. 1828:1541-1549.
- Dolphin, A.C. 2016. Voltage-gated calcium channels and their auxiliary subunits: physiology and pathophysiology and pharmacology. *J Physiol*. 594:5369-5390.
- Fan, M., Z. Buraei, H.R. Luo, R. Levenson-Palmer, and J. Yang. 2010. Direct inhibition of P/Q-type voltage-gated Ca<sup>2+</sup> channels by Gem does not require a direct Gem/Cavbeta interaction. *Proc Natl Acad Sci U S A*. 107:14887-14892.
- Fan, M., W.K. Zhang, Z. Buraei, and J. Yang. 2012. Molecular determinants of Gem protein inhibition of P/Q-type Ca<sup>2+</sup> channels. *J Biol Chem*. 287:22749-22758.
- Finlin, B.S., and D.A. Andres. 1997. Rem is a new member of the Rad- and Gem/Kir Ras-related GTP-binding protein family repressed by lipopolysaccharide stimulation. *J Biol Chem*. 272:21982-21988.
- Finlin, B.S., S.M. Crump, J. Satin, and D.A. Andres. 2003. Regulation of voltage-gated calcium channel activity by the Rem and Rad GTPases. *Proc Natl Acad Sci U S A*. 100:14469-14474.
- Finlin, B.S., A.L. Mosley, S.M. Crump, R.N. Correll, S. Ozcan, J. Satin, and D.A. Andres. 2005. Regulation of L-type Ca<sup>2+</sup> channel activity and insulin secretion by the Rem2 GTPase. *J Biol Chem*. 280:41864-41871.
- Finlin, B.S., H. Shao, K. Kadono-Okuda, N. Guo, and D.A. Andres. 2000. Rem2, a new member of the Rem/Rad/Gem/Kir family of Ras-related GTPases. *Biochem J*. 347 Pt 1:223-231.
- Fitzgerald, E.M., and A.C. Dolphin. 1997. Regulation of rat neuronal voltage-dependent calcium channels by endogenous p21-ras. *Eur J Neurosci*. 9:1252-1261.
- Ghiretti, A.E., K. Kenny, M.T. Marr, 2nd, and S. Paradis. 2013. CaMKII-dependent phosphorylation of the GTPase Rem2 is required to restrict dendritic complexity. *J Neurosci*. 33:6504-6515.
- Ghiretti, A.E., A.R. Moore, R.G. Brenner, L.F. Chen, A.E. West, N.C. Lau, S.D. Van Hooser, and S. Paradis. 2014. Rem2 is an activity-dependent negative regulator of dendritic complexity in vivo. *J Neurosci*. 34:392-407.
- Gunton, J.E., M. Sisavanh, R.A. Stokes, J. Satin, L.S. Satin, M. Zhang, S.M. Liu, W. Cai, K. Cheng, G.J. Cooney, D.R. Laybutt, T. So, J.C. Molero, S.T. Grey, D.A. Andres, M.S. Rolph, and C.R. Mackay. 2012. Mice deficient in GEM GTPase show abnormal glucose homeostasis due to defects in beta-cell calcium handling. *PLoS One*. 7:e39462.
- Hahnel, C., K. Gottmann, A. Wittinghofer, and H.D. Lux. 1992. p21ras Oncogene Protein Selectively Increases Low-voltage-activated Ca<sup>2+</sup> Current Density in Embryonic Chick Dorsal Root Ganglion Neurons. *Eur J Neurosci*. 4:361-368.

- Heo, W.D., T. Inoue, W.S. Park, M.L. Kim, B.O. Park, T.J. Wandless, and T. Meyer. 2006. PI(3,4,5)P3 and PI(4,5)P2 lipids target proteins with polybasic clusters to the plasma membrane. *Science*. 314:1458-1461.
- Hescheler, J., F.J. Klinz, G. Schultz, and A. Wittinghofer. 1991. Ras proteins activate calcium channels in neuronal cells. *Cell Signal*. 3:127-133.
- Hsiao, B.Y., T.K. Chang, I.T. Wu, and M.Y. Chen. 2014. Rad GTPase inhibits the NFkappaB pathway through interacting with RelA/p65 to impede its DNA binding and target gene transactivation. *Cell Signal*. 26:1437-1444.
- Jack, B.R., A.G. Meyer, J. Echave, and C.O. Wilke. 2016. Functional Sites Induce Long-Range Evolutionary Constraints in Enzymes. *PLoS Biol*. 14:e1002452.
- Kalia, J., M. Milescu, J. Salvatierra, J. Wagner, J.K. Klint, G.F. King, B.M. Olivera, and F. Bosmans. 2015. From foe to friend: using animal toxins to investigate ion channel function. *J Mol Biol*. 427:158-175.
- Katz, M., S. Subramaniam, O. Chomsky-Hecht, V. Tsemakhovich, V. Flockerzi, E. Klussmann, J.A. Hirsch, S. Weiss, and N. Dascal. 2021. Reconstitution of beta-adrenergic regulation of CaV1.2: Rad-dependent and Rad-independent protein kinase A mechanisms. *Proc Natl Acad Sci U S A*. 118.
- Kelly, K. 2005. The RGK family: a regulatory tail of small GTP-binding proteins. *Trends Cell Biol*. 15:640-643.
- Lei, S., W.F. Dryden, and P.A. Smith. 1998. Involvement of Ras/MAP kinase in the regulation of Ca<sup>2+</sup> channels in adult bullfrog sympathetic neurons by nerve growth factor. *J Neurophysiol*. 80:1352-1361.
- Leyris, J.P., C. Gondeau, A. Charnet, C. Delattre, M. Rousset, T. Cens, and P. Charnet. 2009. RGK GTPase-dependent CaV2.1 Ca<sup>2+</sup> channel inhibition is independent of CaVbeta-subunit-induced current potentiation. *FASEB J*. 23:2627-2638.
- Liu, G., A. Papa, A.N. Katchman, S.I. Zakharov, D. Roybal, J.A. Hennessey, J. Kushner, L. Yang, B.X. Chen, A. Kushnir, K. Dangas, S.P. Gygi, G.S. Pitt, H.M. Colecraft, M. Ben-Johny, M. Kalocsay, and S.O. Marx. 2020. Mechanism of adrenergic CaV1.2 stimulation revealed by proximity proteomics. *Nature*. 577:695-700.
- London, N., B. Raveh, and O. Schueler-Furman. 2013. Druggable protein-protein interactions--from hot spots to hot segments. *Curr Opin Chem Biol*. 17:952-959.
- Maguire, J., T. Santoro, P. Jensen, U. Siebenlist, J. Yewdell, and K. Kelly. 1994. Gem: an induced, immediate early protein belonging to the Ras family. *Science*. 265:241-244.
- Magyar, J., C.E. Kiper, G. Sievert, W. Cai, G.X. Shi, S.M. Crump, L. Li, S. Niederer, N. Smith, D.A. Andres, and J. Satin. 2012. Rem-GTPase regulates cardiac myocyte L-type calcium current. *Channels (Austin)*. 6:166-173.
- Manning, J.R., G. Yin, C.N. Kaminski, J. Magyar, H.Z. Feng, J. Penn, G. Sievert, K. Thompson, J.P. Jin, D.A. Andres, and J. Satin. 2013. Rad GTPase deletion increases L-type calcium channel current leading to increased cardiac contraction. *J Am Heart Assoc*. 2:e000459.
- Marino, S.M., and V.N. Gladyshev. 2010. Cysteine function governs its conservation and degeneration and restricts its utilization on protein surfaces. *J Mol Biol*. 404:902-916.

- McCleskey, E.W., A.P. Fox, D.H. Feldman, L.J. Cruz, B.M. Olivera, R.W. Tsien, and D. Yoshikami. 1987. Omega-conotoxin: direct and persistent blockade of specific types of calcium channels in neurons but not muscle. *Proc Natl Acad Sci U S A.* 84:4327-4331.
- Moore, A.R., A.E. Ghiretti, and S. Paradis. 2013. A loss-of-function analysis reveals that endogenous Rem2 promotes functional glutamatergic synapse formation and restricts dendritic complexity. *PLoS One.* 8:e74751.
- Opatowsky, Y., O. Chomsky-Hecht, M.G. Kang, K.P. Campbell, and J.A. Hirsch. 2003. The voltage-dependent calcium channel beta subunit contains two stable interacting domains. *J Biol Chem.* 278:52323-52332.
- Opatowsky, Y., Y. Sasson, I. Shaked, Y. Ward, O. Chomsky-Hecht, Y. Litvak, Z. Selinger, K. Kelly, and J.A. Hirsch. 2006. Structure-function studies of the G-domain from human gem, a novel small G-protein. *FEBS Lett.* 580:5959-5964.
- Oz, S., I. Pankonien, A. Belkacemi, V. Flockerzi, E. Klussmann, H. Haase, and N. Dascal. 2017. Protein kinase A regulates C-terminally truncated CaV 1.2 in *Xenopus* oocytes: roles of N- and C-termini of the alpha1C subunit. *J Physiol.* 595:3181-3202.
- Ozdemir, E.S., A. Gursoy, and O. Keskin. 2018. Analysis of single amino acid variations in singlet hot spots of protein-protein interfaces. *Bioinformatics.* 34:i795-i801.
- Pang, C., S.M. Crump, L. Jin, R.N. Correll, B.S. Finlin, J. Satin, and D.A. Andres. 2010. Rem GTPase interacts with the proximal Ca(V)1.2 C-terminus and modulates calcium-dependent channel inactivation. *Channels (Austin).* 4.
- Pollock, J.D., and S.G. Rane. 1996. p21ras signaling is necessary but not sufficient to mediate neurotrophin induction of calcium channels in PC12 cells. *J Biol Chem.* 271:8008-8014.
- Puhl, H.L., 3rd, V.B. Lu, Y.J. Won, Y. Sasson, J.A. Hirsch, F. Ono, and S.R. Ikeda. 2014. Ancient origins of RGK protein function: modulation of voltage-gated calcium channels preceded the protostome and deuterostome split. *PLoS One.* 9:e100694.
- Reynet, C., and C.R. Kahn. 1993. Rad: a member of the Ras family overexpressed in muscle of type II diabetic humans. *Science.* 262:1441-1444.
- Sasson, Y., L. Navon-Perry, D. Huppert, and J.A. Hirsch. 2011. RGK family G-domain:GTP analog complex structures and nucleotide-binding properties. *J Mol Biol.* 413:372-389.
- Servili, E., M. Trus, D. Maayan, and D. Atlas. 2018. beta-Subunit of the voltage-gated Ca(2+) channel Cav1.2 drives signaling to the nucleus via H-Ras. *Proc Natl Acad Sci U S A.* 115:E8624-E8633.
- Shistik, E., T. Ivanina, Y. Blumenstein, and N. Dascal. 1998. Crucial role of N terminus in function of cardiac L-type Ca<sup>2+</sup> channel and its modulation by protein kinase C. *J Biol Chem.* 273:17901-17909.
- Singer, D., M. Biel, I. Lotan, V. Flockerzi, F. Hofmann, and N. Dascal. 1991. The roles of the subunits in the function of the calcium channel. *Science.* 253:1553-1557.
- Splingard, A., J. Menetrey, M. Perderiset, J. Cicolari, K. Regazzoni, F. Hamoudi, L. Cabanie, A. El Marjou, A. Wells, A. Houdusse, and J. de Gunzburg. 2007. Biochemical and structural characterization of the gem GTPase. *J Biol Chem.* 282:1905-1915.

- Stiegler, A.L., and T.J. Boggon. 2020. The pseudoGTPase group of pseudoenzymes. *FEBS J.* 287:4232-4245.
- Wang, H.G., C. Wang, and G.S. Pitt. 2011. Rem2-targeted shRNAs reduce frequency of miniature excitatory postsynaptic currents without altering voltage-gated Ca(2)(+) currents. *PLoS One.* 6:e25741.
- Ward, Y., B. Spinelli, M.J. Quon, H. Chen, S.R. Ikeda, and K. Kelly. 2004. Phosphorylation of critical serine residues in Gem separates cytoskeletal reorganization from down-regulation of calcium channel activity. *Mol Cell Biol.* 24:651-661.
- Ward, Y., S.F. Yap, V. Ravichandran, F. Matsumura, M. Ito, B. Spinelli, and K. Kelly. 2002. The GTP binding proteins Gem and Rad are negative regulators of the Rho-Rho kinase pathway. *J Cell Biol.* 157:291-302.
- Xu, X., S.O. Marx, and H.M. Colecraft. 2010. Molecular mechanisms, and selective pharmacological rescue, of Rem-inhibited CaV1.2 channels in heart. *Circ Res.* 107:620-630.
- Yang, T., and H.M. Colecraft. 2013. Regulation of voltage-dependent calcium channels by RGK proteins. *Biochim Biophys Acta.* 1828:1644-1654.
- Yang, T., A. Puckerin, and H.M. Colecraft. 2012. Distinct RGK GTPases differentially use alpha1- and auxiliary beta-binding-dependent mechanisms to inhibit CaV1.2/CaV2.2 channels. *PLoS One.* 7:e37079.
- Yang, T., Y. Suhail, S. Dalton, T. Kernan, and H.M. Colecraft. 2007. Genetically encoded molecules for inducibly inactivating CaV channels. *Nat Chem Biol.* 3:795-804.
- Yang, T., X. Xu, T. Kernan, V. Wu, and H.M. Colecraft. 2010. Rem, a member of the RGK GTPases, inhibits recombinant CaV1.2 channels using multiple mechanisms that require distinct conformations of the GTPase. *J Physiol.* 588:1665-1681.

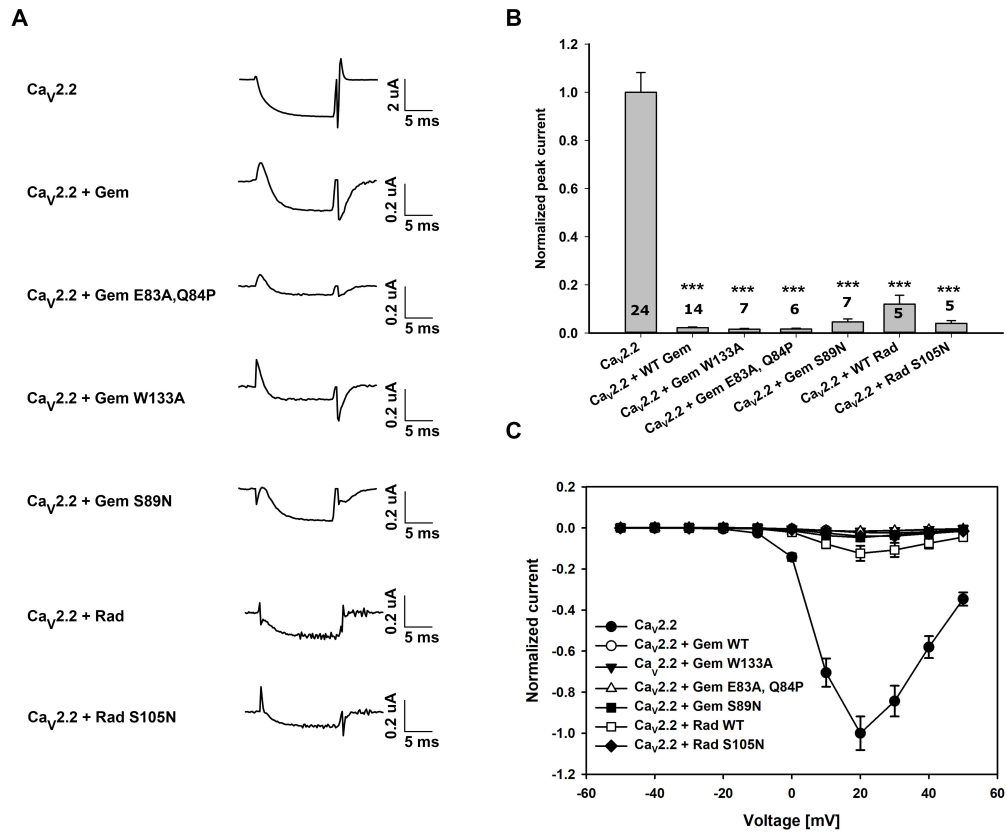

Figure 1

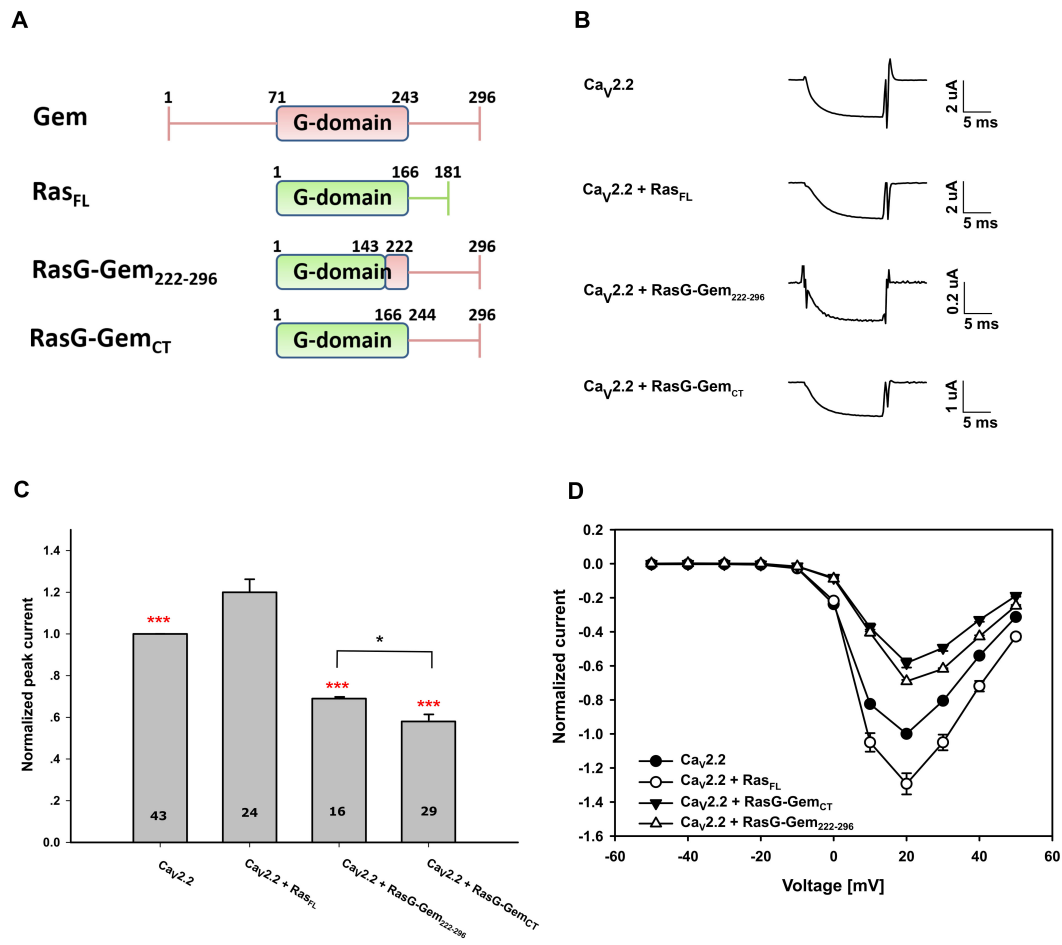

**Figure 2**



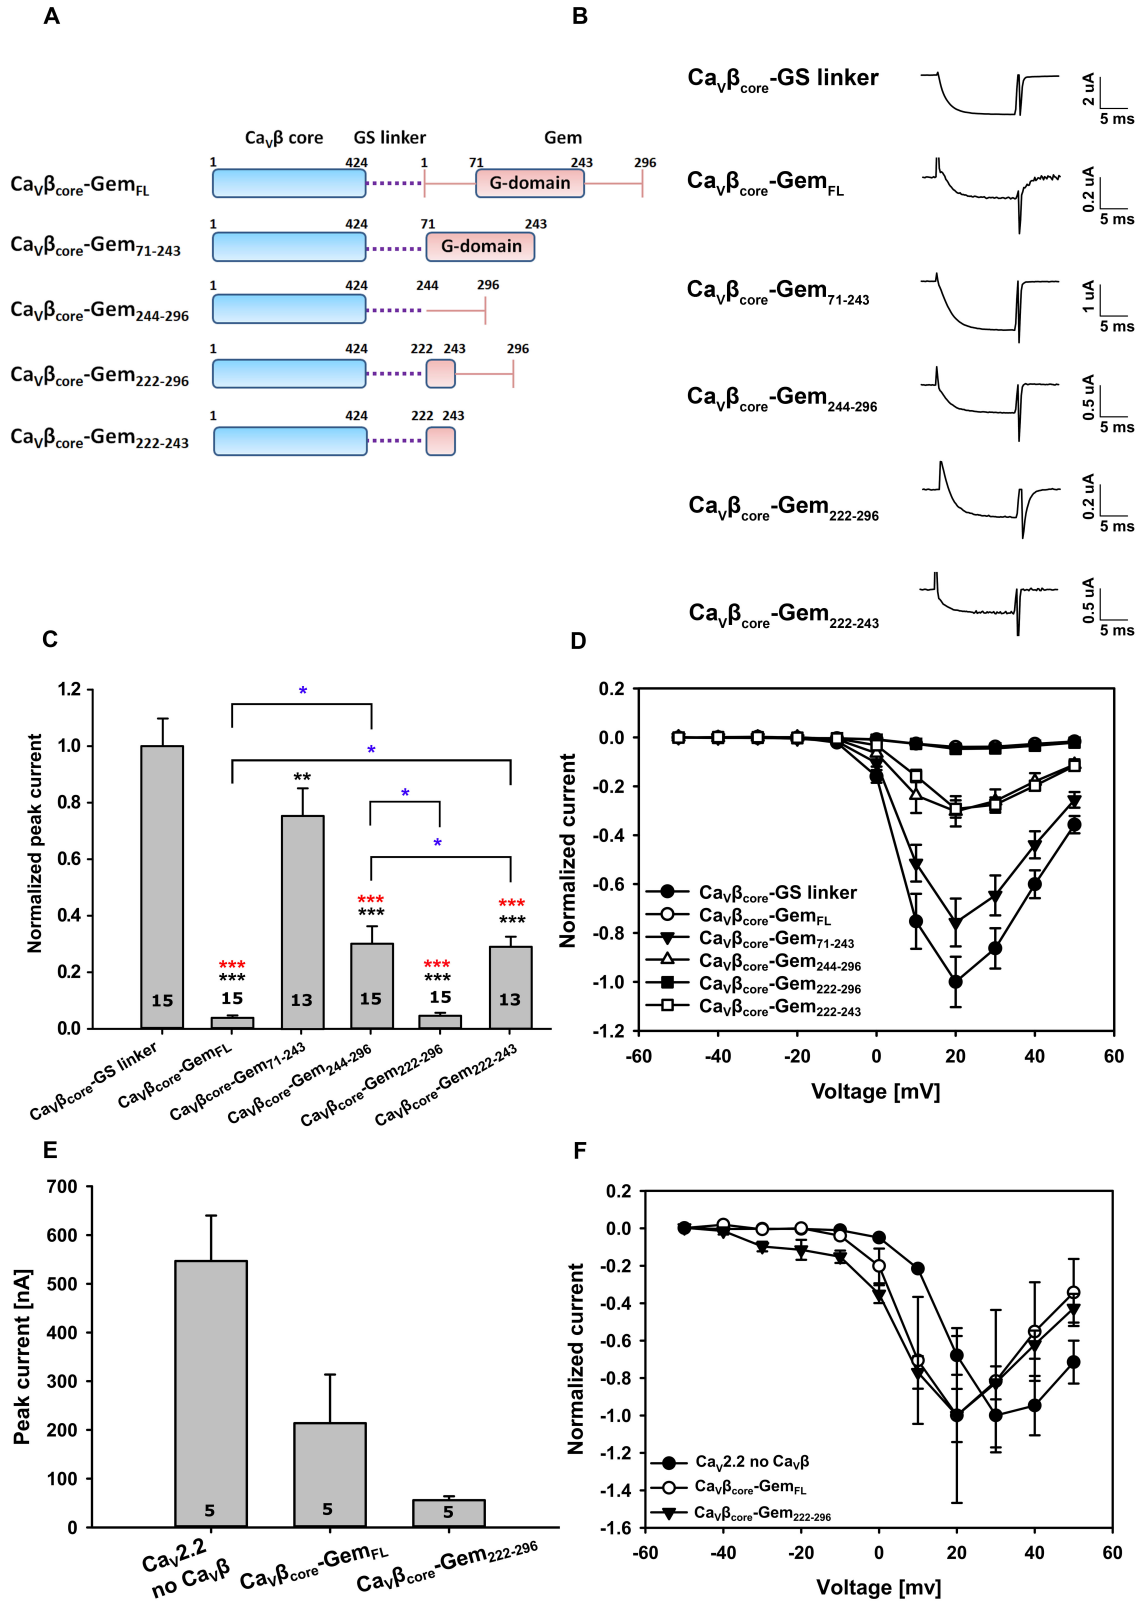

**Figure 3**

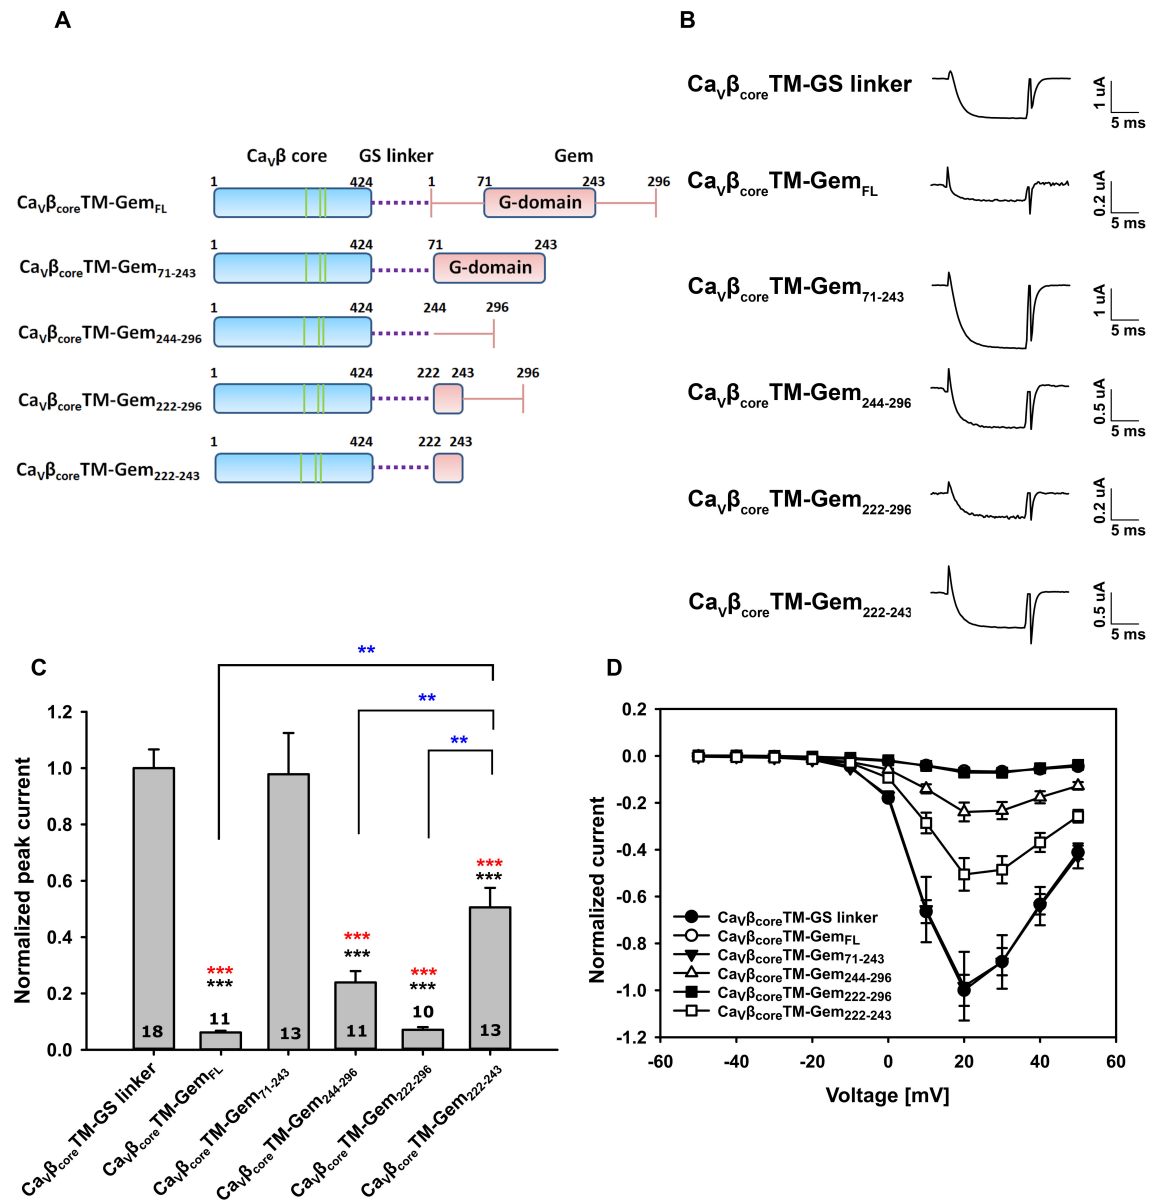

Figure 4

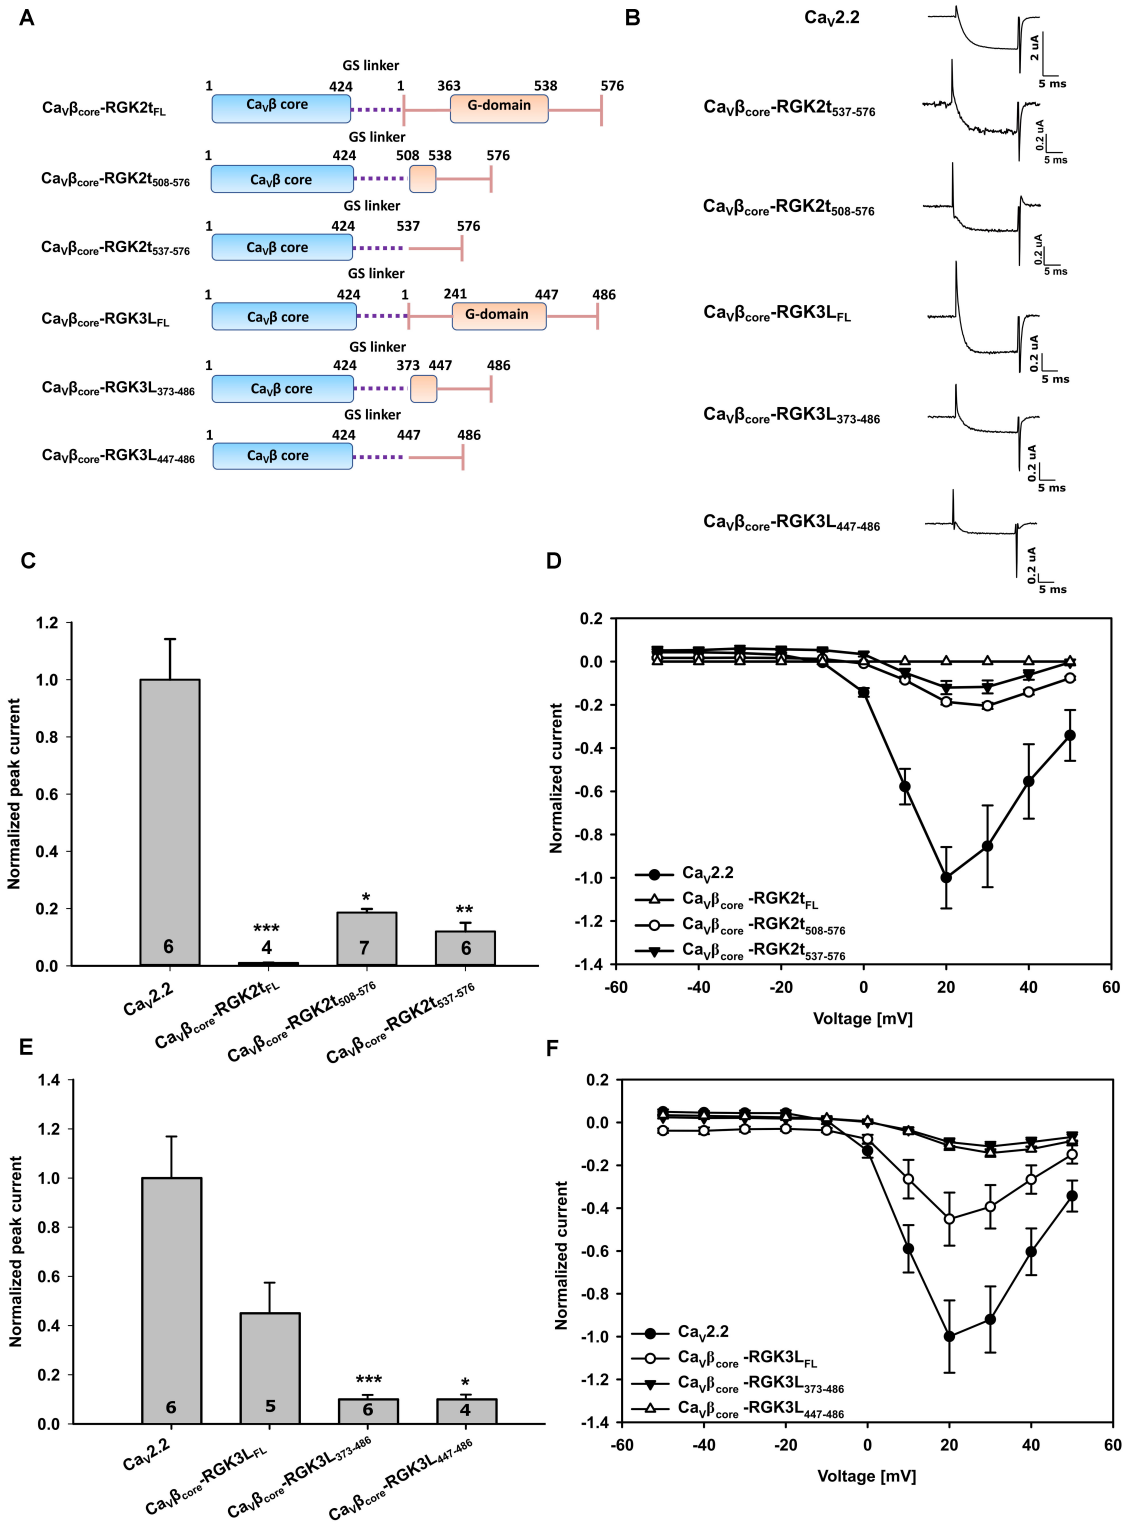

**Figure 5**

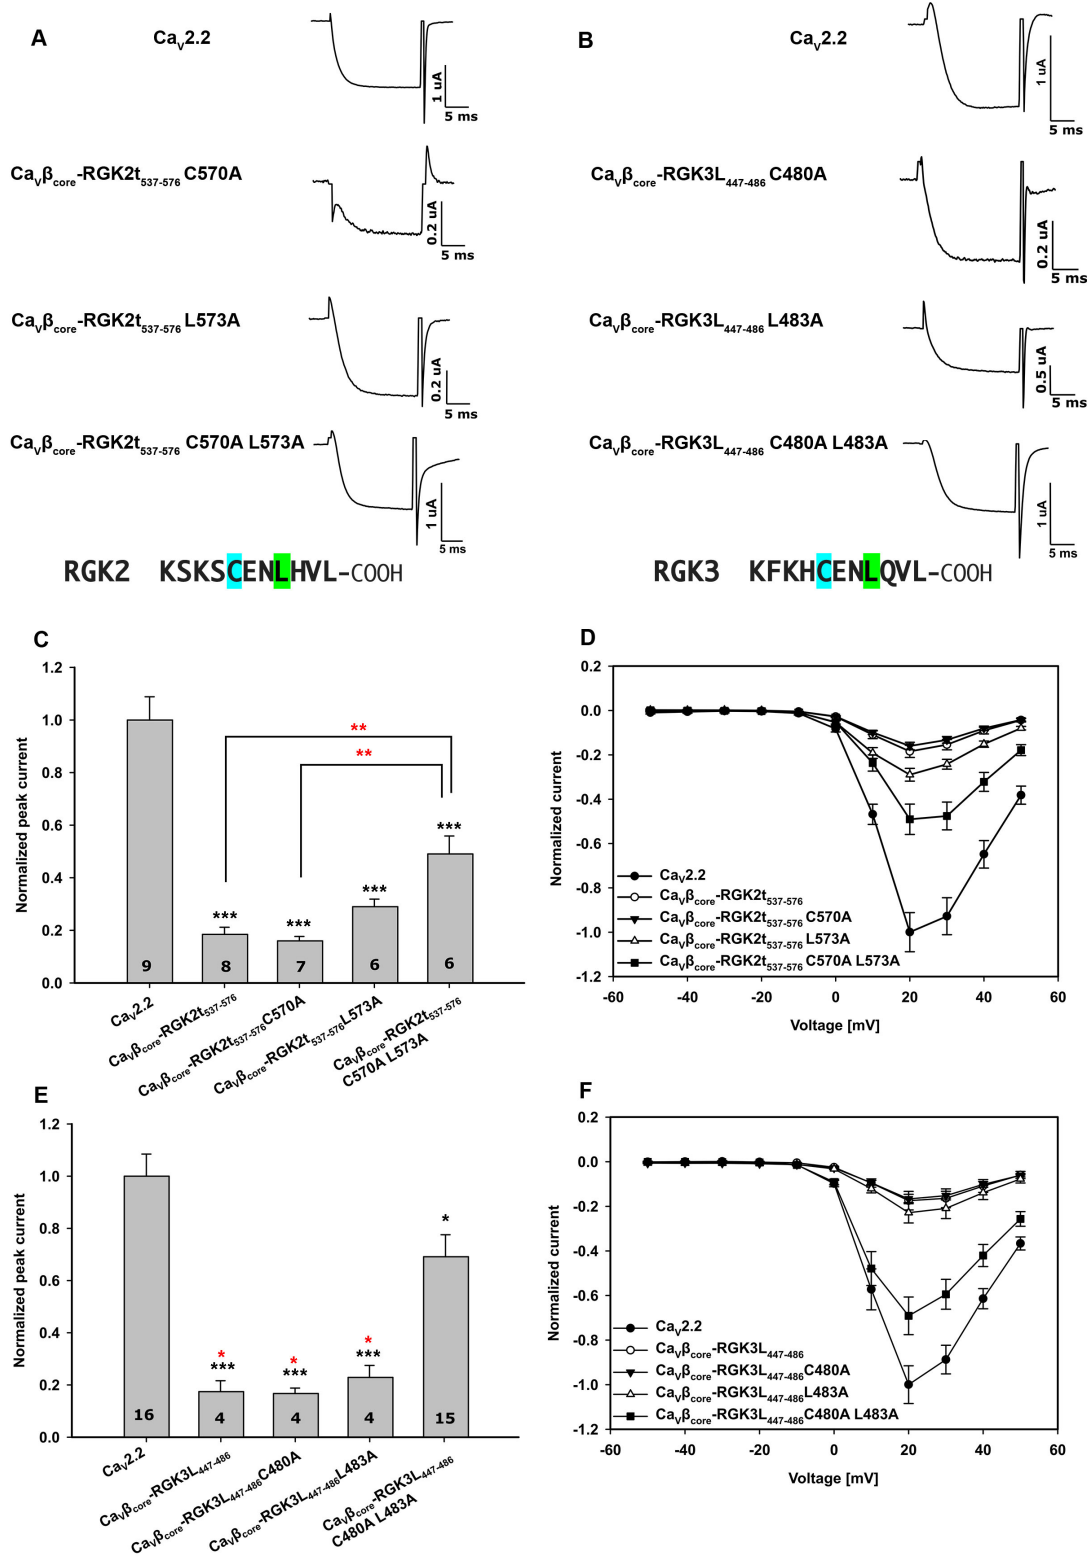

**Figure 6**
